## RESEARCH ARTICLE

# Mapping CircRNA–miRNA–mRNA regulatory axis identifies hsa\_circ\_0080942 and hsa\_circ\_0080135 as a potential theranostic agents for SARS-CoV-2 infection

Hassan Ayaz<sup>1</sup>✉, Nouman Aslam<sup>1</sup>✉, Faryal Mehwish Awan<sup>1\*</sup> , Rabea Basri<sup>1</sup>, Bisma Rauff<sup>2</sup>, Badr Alzahrani<sup>3</sup>, Muhammad Arif<sup>1</sup>, Aqsa Ikram<sup>4</sup>, Ayesha Obaid<sup>1</sup>, Anam Naz<sup>4</sup>, Sadiq Noor Khan<sup>1</sup>, Burton B. Yang<sup>5,6,7</sup>, Azhar Nazir<sup>1</sup>

**1** Department of Medical Lab Technology, The University of Haripur (UOH), Haripur, Khyber Pakhtunkhwa, Pakistan, **2** Department of Biomedical Engineering, University of Engineering and Technology (UET), Lahore, Narowal, Pakistan, **3** Department of Clinical Laboratory Sciences, College of Applied Medical Sciences, Jouf University, Sakaka, Saudi Arabia, **4** Institute of Molecular Biology and Biotechnology (IMBB), The University of Lahore (UOL), Lahore, Pakistan, **5** Sunnybrook Research Institute, Sunnybrook Health Sciences Centre, Toronto, Canada, **6** Department of Laboratory Medicine and Pathobiology, University of Toronto, Toronto, Canada, **7** Institute of Medical Sciences, University of Toronto, Toronto, Canada

✉ These authors contributed equally to this work.

\* [faryal.mehwish@uoh.edu.pk](mailto:faryal.mehwish@uoh.edu.pk), [faryal\\_mehwish@yahoo.com](mailto:faryal_mehwish@yahoo.com)

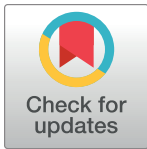

## OPEN ACCESS

**Citation:** Ayaz H, Aslam N, Awan FM, Basri R, Rauff B, Alzahrani B, et al. (2023) Mapping CircRNA–miRNA–mRNA regulatory axis identifies hsa\_circ\_0080942 and hsa\_circ\_0080135 as a potential theranostic agents for SARS-CoV-2 infection. PLoS ONE 18(4): e0283589. <https://doi.org/10.1371/journal.pone.0283589>

**Editor:** Kanhaiya Singh, Indiana University Purdue University at Indianapolis, UNITED STATES

**Received:** December 20, 2022

**Accepted:** March 11, 2023

**Published:** April 13, 2023

**Peer Review History:** PLOS recognizes the benefits of transparency in the peer review process; therefore, we enable the publication of all of the content of peer review and author responses alongside final, published articles. The editorial history of this article is available here: <https://doi.org/10.1371/journal.pone.0283589>

**Copyright:** © 2023 Ayaz et al. This is an open access article distributed under the terms of the [Creative Commons Attribution License](https://creativecommons.org/licenses/by/4.0/), which permits unrestricted use, distribution, and reproduction in any medium, provided the original author and source are credited.

**Data Availability Statement:** Availability of Data and Materials The authors declare that the data supporting the findings of this study are addressed

## Abstract

Non-coding RNAs (ncRNAs) can control the flux of genetic information; affect RNA stability and play crucial roles in mediating epigenetic modifications. A number of studies have highlighted the potential roles of both virus-encoded and host-encoded ncRNAs in viral infections, transmission and therapeutics. However, the role of an emerging type of non-coding transcript, circular RNA (circRNA) in severe acute respiratory syndrome coronavirus 2 (SARS-CoV-2) infection has not been fully elucidated so far. Moreover, the potential pathogenic role of circRNA-miRNA-mRNA regulatory axis has not been fully explored as yet. The current study aimed to holistically map the regulatory networks driven by SARS-CoV-2 related circRNAs, miRNAs and mRNAs to uncover plausible interactions and interplay amongst them in order to explore possible therapeutic options in SARS-CoV-2 infection. Patient datasets were analyzed systematically in a unified approach to explore circRNA, miRNA, and mRNA expression profiles. CircRNA-miRNA-mRNA network was constructed based on cytokine storm related circRNAs forming a total of 165 circRNA-miRNA-mRNA pairs. This study implies the potential regulatory role of the obtained circRNA-miRNA-mRNA network and proposes that two differentially expressed circRNAs hsa\_circ\_0080942 and hsa\_circ\_0080135 might serve as a potential theranostic agents for SARS-CoV-2 infection. Collectively, the results shed light on the functional role of circRNAs as ceRNAs to sponge miRNA and regulate mRNA expression during SARS-CoV-2 infection.

within the article and confirm that all the datasets analyzed during the current study are accessible from the literature as well as from the GEO database (<https://www.ncbi.nlm.nih.gov/gds/>) with accession details (GSE166552, GSE19137, PRJCA002617, (McDonald, Enguita et al. 2021), (Arora, Singh et al. 2020), (Farr, Rootes et al. 2021), (Li, Hu et al. 2020), (Chow and Salmena 2020), (Demirci and Demirci 2021), (Chi, Ge et al. 2020), (Lin, Luo et al. 2020), (Chen, Wu et al. 2020), (Chen, Liu et al. 2020), (Blanco-Melo, Nilsson-Payant et al. 2020), (Li, Hu et al. 2020), (Del Valle, Kim-Schulze et al. 2020), (Qin, Zhou et al. 2020), (Yang, Shen et al. 2020), (Dhar, Vishnupriyan et al. 2021), and (Huang, Wang et al. 2020) datasets).

**Funding:** The authors extend their appreciation to the Deputyship for Research & Innovation, Ministry of Education in Saudi Arabia for funding this research work through the project number 223202.

**Competing interests:** The authors have declared that no competing interests exist.

## Introduction

Severe acute respiratory syndrome coronavirus 2 (SARS-CoV-2), an enveloped RNA virus with a genome size of 29,903 bp, is a highly infectious and pathogenic coronavirus [1]. Initially, on December 31, 2019, China reported unusual viral pneumonia outbreak in the city of Wuhan. Since then, the virus SARS-CoV-2 that causes the COReNA VIRUS Disease 2019 (COVID-19) has evolved into a pandemic. Currently, >750 million people have been infected globally while >6.8 million people have lost their lives due to COVID-19 (World Health Organization, February 22, 2023). Once inside the host cell, SARS-CoV-2 triggers strong innate immune response with excessive production and infiltration of pro-inflammatory cytokines resulting in COVID-19 associated cytokine storm [2]. A cytokine storm is an umbrella term which describes a kind of hyper-inflammatory reaction that can result in life threatening systemic inflammation, immune dysregulation and multi-organ failure if left untreated [3]. These inflammatory mediators are being intricately controlled by regulatory machinery employed by the host cell [4]. Researchers initially focused upon studying disease pathogenesis and development of vaccines in response to COVID-19 pandemic. However, currently more focus has shifted towards elucidating the molecular mechanisms involved in various pathological responses exhibited during the course of infection. It is postulated that differentially expressed non-coding RNAs (ncRNAs) might be implicated in the regulation of the cellular processes which regulate the SARS-CoV-2 pathogenicity and cytokine-mediated immune responses [5]. Current study focuses on the premise that the variations in expression of these ncRNAs may possibly present a novel avenue to explore the pathogenesis of COVID-19.

Recent advances in high-throughput sequencing technologies and computational methods have discovered a substantial number of ncRNA ultimately providing new insights into their role in a range of human diseases [6, 7]. Various studies have shown that the ncRNAs, which include microRNAs (miRNAs), long non-coding RNAs (lncRNAs), and circular RNAs (circRNAs) play a crucial role in the progression of viral diseases [7–10]. miRNAs, one of the type of ncRNA are quite well studied and are known to play a pivotal role in the regulation of many genes, especially those at intersections of signaling pathways involved in development and growth control [11, 12]. Interestingly, viruses have been reported to interact with cellular miRNAs to manipulate both viral and cellular gene expression as well as to augment their replication potential [7, 13]. Moreover, miRNAs regulate viral persistence, host immune evasion and long-term survival in the host cell [14, 15]. Likewise, the expression of cellular lncRNAs may also be altered in response to viral replication inside the cell. It has been reported that many cellular lncRNAs are expressed in response to the antiviral pathways activated by viral infections [10, 16]. It is important to note that lncRNAs utilized by the viral machinery to enhance its replication could be those lncRNAs which are up-regulated in response to viral infections. Similarly, to counteract viral infection, the host cell has evolved to generate various cellular lncRNAs [10].

On the other hand, circRNAs, a novel class of ncRNAs have been reported to play crucial role in regulating viral infections and their dysregulation has been implicated in the pathogenesis of various diseases [17, 18]. While the biological functions of the majority of circRNAs are still not established, accumulating piece of evidence confirms that circRNAs perform many regulatory functions via translocating or sequestering proteins, exerting transcriptional and translational control as well as facilitating interactions between proteins [18]. circRNAs play multifunctional roles hence they are implicated in a range of biological and pathological processes that may affect the progression of several diseases including viral infections [19, 20]. Moreover, circRNAs modulate the innate immune responses during viral infections as well. Additionally, circRNAs have also been recommended as biomarkers for differentiating viral from non-viral infections [21, 22].

The circRNA–miRNA–mRNA regulatory axis has been shown to be of high importance in association with several human diseases including cancers, diabetes, Alzheimer's disease, and cardiovascular diseases [23–25]. These networks are involved in signaling pathways of different human diseases by regulating expression profiling of pathogenicity-related genes [24]. In essence, circRNAs regulates the expression of downstream target genes of miRNA, in turn miRNA can decrease the stability of the mRNA or in other words inhibit the translation of the mRNA by targeting its 3'-untranslated region (UTR), thus, negatively regulating the expression of the target genes [26]. Increasing evidence has suggested that this regulatory axis might also be involved in regulating crucial mechanisms in immune related response to SARS-CoV-2 [27].

There is an abundance of COVID-19 related transcriptomics studies and data, however, their use is limited by the confounding factors pertaining to each study. In the current study, we have analyzed different datasets in a unified approach which might help in understanding the molecular basis of COVID-19. Moreover, reverse engineering approach was utilized to derive regulatory interactions between circRNAs, miRNAs and mRNAs from gene expression data of SARS-CoV-2 patients. In order to gain better understanding of molecular and immuno-pathological basis, possible regulatory mechanisms of circRNA–miRNA–mRNA axis during SARS-CoV-2 infection were investigated. The circRNA–miRNA–mRNA regulatory network consisting of differentially expressed circRNAs and their downstream miRNAs and target mRNAs have been constructed for SARS CoV-2 related pathogenesis. The circRNAs that may play critical roles in regulating the cytokine storm during SARS-CoV-2 infection were identified. The results from this study revealed some candidate circRNAs that might function as potential theranostic agents in SARS-CoV-2 infection. Moreover, targeting the "cytokine storm" using circRNAs might be a feasible therapeutic approach to combat COVID-19 (Fig 1). Together, this research provides new insights into the triple regulatory network controlled by the circRNA–miRNA–mRNA regulatory axis. The results also provide possible understandings on the roles of circRNAs in host-virus interactions and will facilitate research studies on SARS-CoV-2 infection and pathogenesis in the future.

## Materials and methods

### Data acquisition and processing

The Gene Expression Omnibus (GEO) [28] (<https://www.ncbi.nlm.nih.gov/geo/>), a database supported by the National Center for Biotechnology Information (NCBI) at the National Library of Medicine (NLM) was used to access the microarray and RNA-sequencing datasets that contains circRNA, miRNA and mRNA expression profiles of SARS-CoV-2 infected patients at various stages (Table 1) (Fig 2). GEO accepts high-throughput gene expression profiles (both raw and processed data) along with sample characteristics, methodology, and experimental research design [29]. Two circRNA datasets including GSE166552 [17] and PRJCA002617 [30] were retrieved after comprehensive screening. Six miRNA datasets including [27, 31–35] were screened. Moreover, fifteen datasets of mRNA expression profiles were retrieved including GSE19137, GSE166552, PRJCA002617, [32, 33, 36–45] datasets. We also downloaded datasets from national genomic data center (<https://ngdc.cncb.ac.cn/>). As the present study does not involve human subjects and due to free availability of data in the GEO database, neither ethical approval nor informed consent was required.

The GSE166552 dataset included 06 samples (03 SARS-CoV-2 positive and 03 controls). The PRJCA002617 dataset included 24 samples (12 SARS-CoV-2 positive and 12 controls). McDonald et al., dataset included 45 samples (25 SARS-CoV-2 infected patient samples and 20 healthy controls). The GSE19137 dataset included 21 samples (03 negative and 18 positive

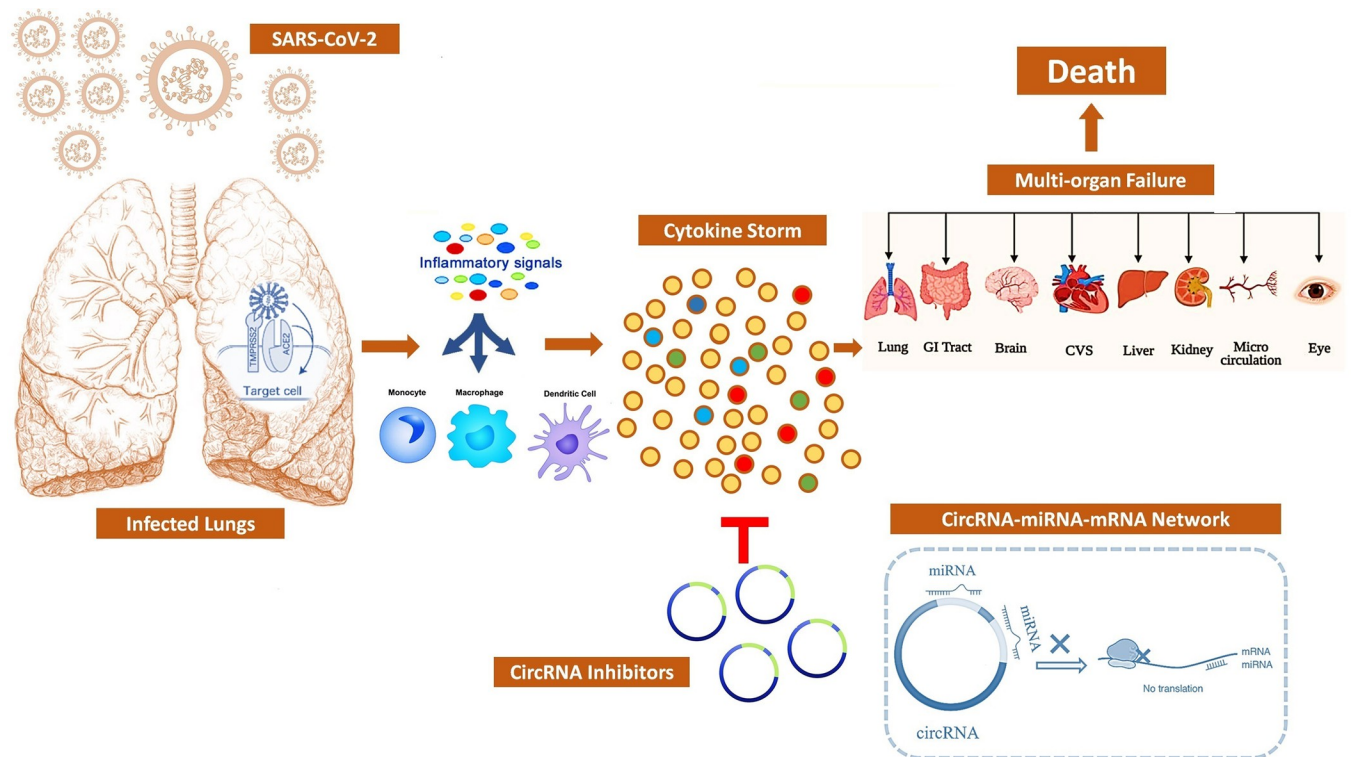

**Fig 1. Using circRNA based therapeutics to mitigate cytokine storm syndrome induced by SARS-CoV-2.**

<https://doi.org/10.1371/journal.pone.0283589.g001>

for SARS-CoV). Chow et al., dataset included 249 samples (147 SARS-CoV-2 infected samples and 102 controls). Dhar et al., dataset included 2157 samples (including 915 severe COVID-19 patients). Liu et al., dataset contained 40 samples in his study (including 13 severe COVID-19 patients). Farr et al., dataset included 20 samples (10 COVID-19 patients and 10 age and gender matched healthy controls). Li et al., dataset included 14 samples (10 COVID-19 patients and 4 healthy donors). Huang et al., dataset comprised of 41 samples (including 13 severe COVID-19 patients). Chi et al., dataset included 70 SARS-CoV-2 infected patients, 04 convalescent cases and 04 healthy controls. Lin et al., dataset included 334 samples in their study (including 23 severe COVID-19 patient samples). Chen et al(b), dataset included 21 samples (including 11 severe COVID-19 patient samples). Chen et al(c), dataset study contained 29 samples (including 14 severe COVID-19 patient samples). Blenco Melo et al., included 48 samples (24 SARS-CoV-2 positive samples and 24 negative samples). Del Velle et al., dataset included a total of 1484 samples (1097 positive for SARS-CoV-2 infection and 387 controls). Qin et al., dataset comprised of 452 samples in their study (including 286 severe COVID-19 patient samples). Yang et al., dataset included 50 samples (including 36 severe COVID-19 patient samples).

### Tools for the prediction of circRNA, miRNA and mRNA targets

For the prediction of circRNA targets by using miRNA as an input search, we used different comprehensive databases including CircBank, CircInteractome and RNAInter v4.0 web tools (Table 2). CircBank (<http://www.circbank.cn/>) is a comprehensive, publicly available, functionally annotated human circRNAs database containing information of about 140,000 circRNAs from many different sources [47]. The Users can access information regarding

Table 1. Datasets used for retrieving expression profiles of circRNAs, miRNAs and mRNAs.

| Accession no/ Study details | circRNA/ miRNA/ mRNA | Sample Source                        | Total dysregulated (n) | Up-regulated | Down-regulated |
|-----------------------------|----------------------|--------------------------------------|------------------------|--------------|----------------|
| GSE166552                   | CircRNA              | Whole Blood Samples                  | 70                     | 30           | 40             |
| PRJCA002617                 | CircRNA              | Lung Tissue Samples                  | 31                     | 12           | 19             |
| [31]                        | miRNA                | Blood Samples Nasopharyngeal Samples | 8                      | 1            | 7              |
| [27]                        | miRNA                | Lung Tissue Samples                  | 1                      | -            | 1              |
| [32]                        | miRNA                | Blood Samples Nasopharyngeal Samples | 112                    | 43           | 69             |
| [33]                        | miRNA                | Blood Samples                        | 6                      | 3            | 3              |
| [34]                        | miRNA                | Lung Tissue Samples                  | 6                      | 2            | 4              |
| [35]                        | miRNA                | Lung Tissue Samples                  | 10                     | 5            | 5              |
| GSE166552                   | mRNA                 | Blood Samples                        | 25                     | 11           | 14             |
| GSE19137                    | mRNA                 | Lung Tissue Samples                  | 171                    | 108          | 63             |
| PRJCA002617                 | mRNA                 | Lung Tissue Samples                  | 30                     | 16           | 14             |
| [36]                        | mRNA                 | Blood Samples                        | 11                     | 11           | -              |
| [37]                        | mRNA                 | Blood Samples                        | 6                      | 6            | -              |
| [38]                        | mRNA                 | Blood Samples                        | 6                      | 6            | -              |
| [39]                        | mRNA                 | Blood Samples                        | 2                      | 2            | -              |
| [40]                        | mRNA                 | Lung Tissue Samples                  | 8                      | 8            | -              |
| [46]                        | mRNA                 | Blood Samples                        | 4                      | 4            | -              |
| [41]                        | mRNA                 | Blood Samples                        | 3                      | 3            | -              |
| [42]                        | mRNA                 | Blood Samples Nasopharyngeal Samples | 4                      | 4            | -              |
| [43]                        | mRNA                 | Blood Samples                        | 14                     | 14           | -              |
| [32]                        | mRNA                 | Blood Samples Nasopharyngeal Samples | 3                      | 3            | -              |
| [44]                        | mRNA                 | Nasopharyngeal Samples               | 6                      | 6            | -              |
| [45]                        | mRNA                 | Blood Samples                        | 8                      | 8            | -              |

<https://doi.org/10.1371/journal.pone.0283589.t001>

conservation status, miRNA targets as well as protein coding potential of query circRNAs [47]. CircInteractome (<https://circinteractome.nia.nih.gov/>) is a readily accessible web tool for mapping miRNAs and protein-binding sites on junctions as well as junction-flanking sequences of human circRNAs [48]. RNA Interactome Database, RNAInter v4.0 (<http://www.rnainter.org/>) is a comprehensive RNA-associated interactome platform containing information of more than 41 million interactions of cellular RNAs in 154 species with evidence from both computational and experimental sources [49].

For the prediction of miRNA/ mRNA targets by using mRNAs/miRNAs as an input search, we used databases including miRDB, miRWalk 2.0, miRTarBase, and TargetScan 7.0. miRDB (<http://mirdb.org/>), is an integrative, freely accessible, open platform for the prediction of miRNA targets. miRNA-target interactions with scores  $\geq 80.0$  were considered relevant, statistically significant and with higher confidence in the interactions whereas miRNA-target interactions with scores  $\leq 80.0$  were considered not relevant. By utilizing high-throughput experimental data, miRDB predicts miRNA targets in five species along with integrative analysis of gene ontology (GO) data [50]. miRWalk 2.0 (<http://mirwalk.umm.uni-heidelberg.de/>) provides information of more than 949 million computationally predicted as well as experimentally validated miRNA-mRNA interactions. In order to ensure reliability and accuracy of forecast results, miRWalk 2.0 incorporates 12 algorithms for prediction including miRWalk, mirbridge, Targetscan, Microt4, PITA, Pictar2, RNAhybrid, RNA22, miRNomeMap, miRanda, miRMap and miRDB [51]. Cut-off value with a binding score of  $> 0.95$  was considered as a screening threshold. miRTarBase ([https://miRTarBase.cuhk.edu.cn/~miRTarBase/miRTarBase\\_2022/php/index.php](https://miRTarBase.cuhk.edu.cn/~miRTarBase/miRTarBase_2022/php/index.php)) is a manually curated database containing information of

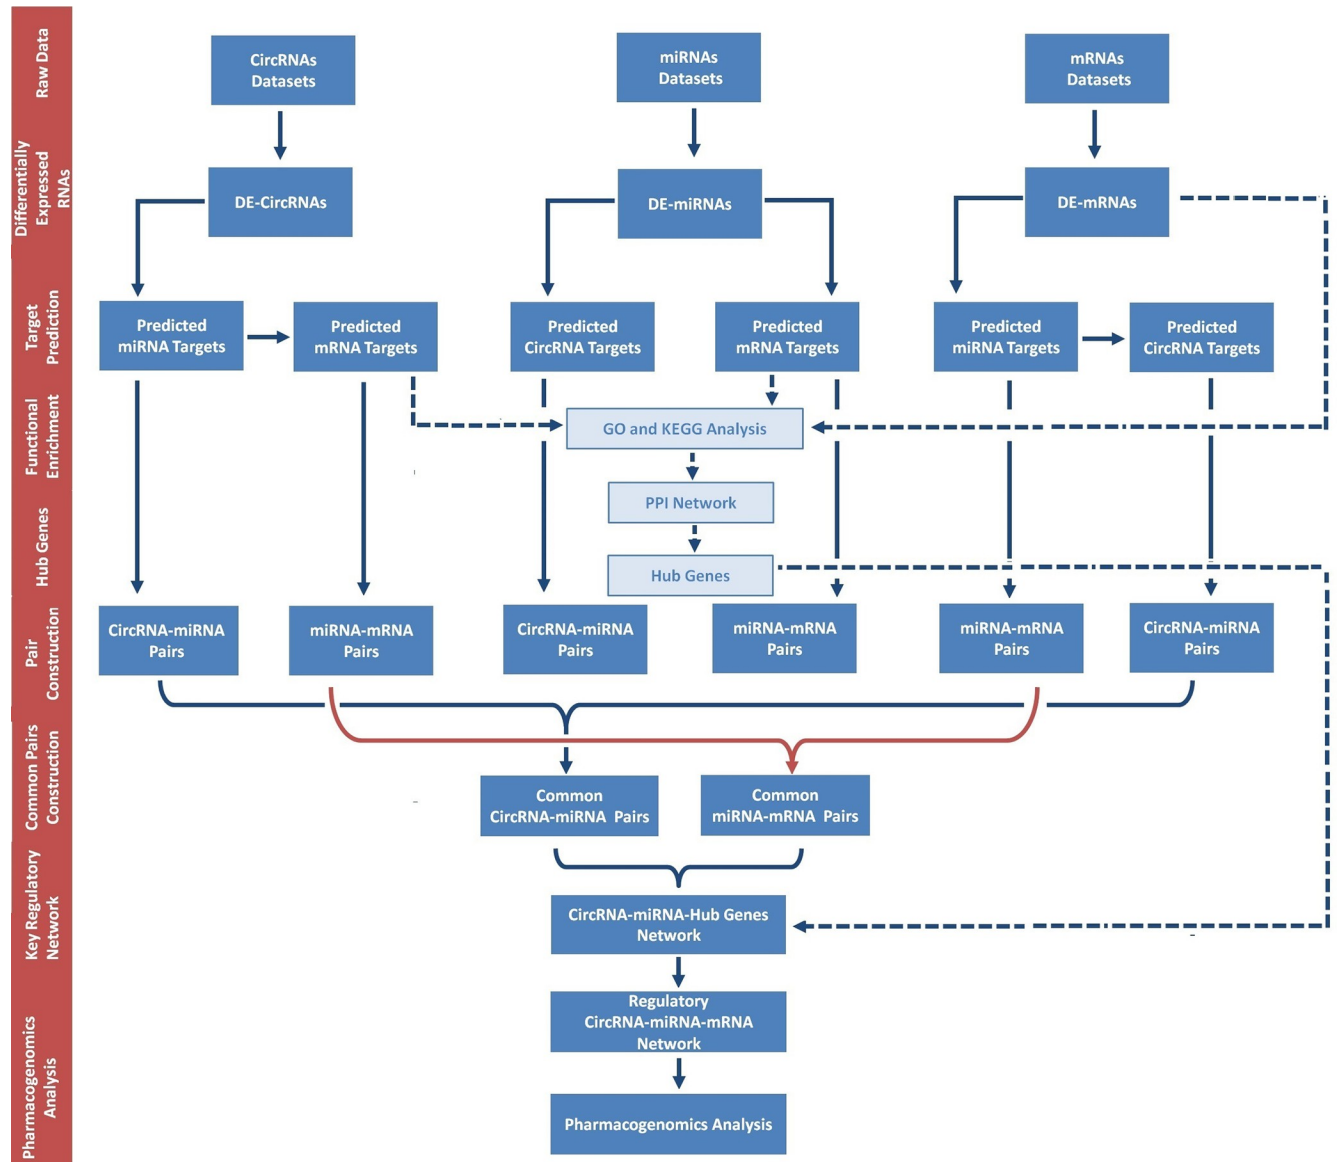

**Fig 2. Flow chart of the approach utilized in the present study for the construction of SARS-CoV-2 related circRNA-miRNA-mRNA regulator network.**

<https://doi.org/10.1371/journal.pone.0283589.g002>

more than 360,000 experimentally validated miRNA-mRNA interactions [52]. miRNA-mRNA interactions have been validated experimentally using microarray, CLIP-seq technology, reporter assays, high through-put sequencing and western blot experiments [52]. All the targets identified via miRTarBase were selected for further analysis. TargetScan v7.0 ([http://www.targetscan.org/vert\\_80/](http://www.targetscan.org/vert_80/)), a flexible web based tool, predicts sequence based effective regulatory targets of miRNAs by incorporating 14 different features [53]. Conservation aggregate score of > 0.80 was considered as selection criteria as this score provides low false discovery rates. An overlap in at least two databases was used as filtering criteria for prioritizing and considering potential candidate targets. Previous comparative studies conducted on miRNA target prediction programs suggested that no program performed consistently superior to all others. Indeed, it has become a common practice for researchers to look at predictions produced by

Table 2. List of all softwares and tools utilized in the current study.

| Software        | Link                                                                                          | References |
|-----------------|-----------------------------------------------------------------------------------------------|------------|
| GEO             | <a href="https://www.ncbi.nlm.nih.gov/gds">https://www.ncbi.nlm.nih.gov/gds</a>               | [29]       |
| GEO2R           | <a href="https://www.ncbi.nlm.nih.gov/geo/geo2r/">https://www.ncbi.nlm.nih.gov/geo/geo2r/</a> | [54]       |
| CircInteractome | <a href="https://circinteractome.nia.nih.gov/">https://circinteractome.nia.nih.gov/</a>       | [48]       |
| Circbank        | <a href="http://www.circbank.cn/">http://www.circbank.cn/</a>                                 | [47]       |
| RNAinter v4.0   | <a href="http://www.rnainter.org/">http://www.rnainter.org/</a>                               | [49]       |
| miRTarBase      | <a href="https://miRTarBase.cuhk.edu.cn/">https://miRTarBase.cuhk.edu.cn/</a>                 | [55]       |
| miRWalk 2.0     | <a href="http://mirwalk.umm.uni-heidelberg.de/">http://mirwalk.umm.uni-heidelberg.de/</a>     | [51]       |
| TargetScan v7.0 | <a href="http://www.targetscan.org/vert_80/">http://www.targetscan.org/vert_80/</a>           | [53]       |
| miRDB           | <a href="http://www.mirdb.org/">http://www.mirdb.org/</a>                                     | [56]       |
| STRING          | <a href="https://string-db.org/">https://string-db.org/</a>                                   | [57]       |
| Cytoscape       | <a href="https://cytoscape.org/">https://cytoscape.org/</a>                                   | [58, 59]   |
| cytoHubba       | <a href="https://cytoscape.org/">https://cytoscape.org/</a>                                   | [60]       |
| MCODE           | <a href="https://cytoscape.org/">https://cytoscape.org/</a>                                   | [59]       |
| DAVID v6.8      | <a href="https://david.ncifcrf.gov/">https://david.ncifcrf.gov/</a>                           | [61]       |
| KEGG            | <a href="https://www.genome.jp/kegg/">https://www.genome.jp/kegg/</a>                         | [62]       |
| PharmGKB        | <a href="https://www.pharmgkb.org/">https://www.pharmgkb.org/</a>                             | [63]       |

<https://doi.org/10.1371/journal.pone.0283589.t002>

different miRNA–target prediction programs and focus on their intersection which might enhance the performance of analyses as well as improve prediction precision. The differences between algorithms are mostly seen in their respective weaknesses, i.e., the subset of false positives. For that reason, the fundamental motivation to focus selectively on the shared prediction by two algorithms is to eliminate false positives while preserving the vast majority of true positive RNAs. Therefore, conclusively, predictions are much more reliable when two or more prediction algorithms are combined, and the minimal loss of true positives are greatly outweighed by the removal of false positives. Selection criteria, threshold and prediction scores for each database were selected on the basis of their previously reported relationship with low false discovery rate and high accuracy in experimental validation studies via PCR and Luciferase assays.

### Data preprocessing and identification of differentially expressed circRNAs, miRNAs, and mRNAs

Background noise correction and quantile normalization of preliminary data were performed. Literature mining and R-base statistical software, GEO2R was utilized for examining the raw gene expression data as well as for the analysis of differential expression profiles of miRNAs, circRNAs and mRNAs. For the datasets retrieved from GEO database, we have utilized GEO2R tool which uses force normalization by applying quantile normalization to the expression data making all selected samples having identical value distribution. For determining whether selected samples were suitable for differential expression analysis, we checked distribution of samples by observing the median-centered values. Median-centered values are generally indicative that the data are normalized and cross-comparable. In summary, data preprocessing was done via log<sub>2</sub> transformation, quantile normalization and base line transformation using the median of the samples. The expression fold change was expressed as base-2 logarithm of FC (log<sub>2</sub>FC) to normalize the expression values obtained from different platforms. For the calculation of false discovery rate and p-value, the GEO2R inbuilt methods were utilized. Differentially expressed genes were considered up-regulated if they met the cut-off criteria of adjusted  $P < 0.05$  and  $|\log_{2}FC| \geq 1$ . For down-regulated ones,  $\log_{2}FC \leq -1$

was considered. LogFC means Log<sub>2</sub>-fold change between two experimental conditions or two groups of Samples. Next, an interactive Venn diagram drawing tool, Venny 2.1.0 (<https://bioinfogp.cnb.csic.es/tools/venny/>) was used to generate Venn diagram to find the intersection among circRNAs, miRNAs, and mRNAs datasets [64].

Previous studies conducted on analysis of RNAs and their targets suggested that no program performed consistently superior to all others. Indeed, it has become a common practice for researchers to look at predictions produced by prediction programs and focus on common findings which might enhance the performance of analyses as well as improve prediction precision. The algorithms mostly agree on highly expressed RNAs, however, in many cases, algorithm-specific false positives with high read counts are predicted, which is resolved by using the shared output from two (or more) algorithms.

### Pathway and functional enrichment analysis

The Database for Annotation, Visualization and Integrated Discovery database (DAVID version 6.8; <https://david.ncifcrf.gov/>), a comprehensive knowledge-base functional classification and agglomeration algorithm was used to perform KEGG (Kyoto Encyclopedia of Genes and Genomes) pathway and GO analysis [61]. In order to increase reliability of results, DAVID incorporates 14 annotation categories including BioCarta Pathways, Swiss-Prot Keywords, Molecular Function, cellular components, KEGG Pathways, Biological Process, UniProt Sequence Features, BBID Pathways, SMART Domains, PIR SuperFamily Names, and InterPro Domains along with NIH Genetic Association DB. A p-value less than 0.05 ( $\leq 0.05$ ) was considered to indicate a statistically significant difference [61]. KEGG is a manually curated bioinformatics resource for deciphering high-level cellular and organism-level functions [65].

### Establishment of PPI networks and module analysis

In order to examine and explore the relationship and association among the differentially expressed genes from the retrieved datasets, we constructed a protein-protein interaction (PPI) network by utilizing the STRING webserver (<https://string-db.org>) [57]. STRING database currently covers more than 9 million proteins from 2,031 organisms. It constructs a PPI network on the basis of direct physical or indirect functional associations. Differentially expressed genes were imported into the STRING database. Afterwards, Cytoscape (<https://cytoscape.org/>), an open source bioinformatics resource was used to analyze and visualize the molecular interaction networks as well as hub genes via importing the obtained source files from STRING [58]. A confident interaction score  $\geq 0.4$  was fixed as cutoff standard. Moreover, the cytoHubba plug-in in Cytoscape was used to search the list of hub genes from the PPI network with node degrees [60]. In addition, via using MCODE plug-in, key modules were then screened and assessed from the PPI network [59].

### Construction of circRNA–miRNA–mRNA network

A circRNA–miRNA–mRNA regulatory network was also constructed by using Cytoscape software.

### Statement

All materials and methods were performed in accordance with the relevant guidelines.



## Results

### Differentially expressed circRNAs

GEO2R along with data mining tools were utilized to generate differentially expressed circRNA, miRNA and mRNA profiles. Two SARS-CoV-2 related circRNA datasets including GSE166552 and PRJCA002617 were retrieved after comprehensive screening. By analyzing the data using GEO2R, differentially expressed circRNAs were identified. A total of 70 dysregulated circRNAs were identified from GSE166552 dataset. In addition, a total of 31 dysregulated circRNAs were identified from PRJCA002617 dataset. Comprehensive analysis of two datasets revealed a total of 101 differentially expressed circRNAs (Table 3) (Fig 3).

### Differentially expressed miRNAs

For the prediction of differentially expressed miRNAs, GEO database and data mining tools were utilized. Six different miRNA datasets including McDonald et al., 2021, Arora et al., 2020, Farr et al., 2021, Li et al., 2020a, Chow et al., 2020 and Demirci et al., 2021 were screened. Findings revealed 112 dysregulated miRNAs in Farr et al., 2021 dataset. Dataset of Demirci et al., 2021, revealed 10 dysregulated miRNAs. In another dataset McDonald et al., 2021, 8 dysregulated miRNAs were retrieved. In another dataset of Li et al., 2020, 6 dysregulated miRNAs were retrieved. In addition, Arora et al., 2020 dataset revealed 1 dysregulated miRNA. Furthermore, a dataset of Chow et al., 2020, revealed 6 dysregulated miRNAs. Comprehensive analysis of six different miRNA datasets revealed 143 differentially expressed miRNAs.

**Table 3. List of count of differentially expressed RNAs and their predicted targets.**

| Datasets                 | Dysregulated circRNAs/miRNAs/mRNAs |                | Predicted Targets |        |        |
|--------------------------|------------------------------------|----------------|-------------------|--------|--------|
|                          | Up-regulated                       | Down-regulated | circRNAs          | miRNAs | mRNA   |
| GSE166552                | 30 circRNAs                        | 40 circRNAs    | –                 | 4316   | 704000 |
| PRJCA002617              | 12 circRNAs                        | 19 circRNAs    | –                 | 1516   |        |
| McDonald et al., 2021    | 1 miRNA                            | 7 miRNAs       | 38937             | –      | 77722  |
| Demirci et al., 2021     | 5 miRNAs                           | 5 miRNAs       |                   | –      |        |
| Farr et al., 2021        | 43 miRNAs                          | 69 miRNAs      |                   | –      |        |
| Li et al., 2020          | 3 miRNAs                           | 3 miRNAs       |                   | –      |        |
| Chow et al., 2020        | 2 miRNAs                           | 4 miRNAs       |                   | –      |        |
| Arora et al., 2020       | 1 miRNAs                           |                |                   | –      |        |
| GSE19137                 | 108 mRNAs                          | 63 mRNAs       | 858423            | 5109   | –      |
| GSE166552                | 11mRNAs                            | 14 mRNAs       |                   |        | –      |
| PRJCA002617              | 16 mRNAs                           | 14mRNAs        |                   |        | –      |
| Chi et al., 2020         | 11mRNAs                            | –              |                   |        | –      |
| Chen et al., 2020b       | 5 mRNAs                            | 1 mRNAs        |                   |        | –      |
| Lin et al., 2020         | 6 mRNAs                            | –              |                   |        | –      |
| Chen et al., 2020c       | 2 mRNAs                            | –              |                   |        | –      |
| Blanco-Melo et al., 2020 | 8 mRNAs                            | –              |                   |        | –      |
| Liu et al., 2020         | 4 mRNAs                            | –              |                   |        | –      |
| Del Valle et al., 2020   | 3 mRNAs                            | –              |                   |        | –      |
| Qin et al., 2020         | 4 mRNAs                            | –              |                   |        | –      |
| Yang et al., 2020        | 14 mRNAs                           | –              |                   |        | –      |
| Farr et al., 2021        | 3 mRNAs                            | –              |                   |        | –      |
| Dhar et al., 2021        | 6 mRNAs                            | –              |                   |        | –      |
| C. Huang et al., 2020    | 8 mRNAs                            | –              | –                 |        |        |

<https://doi.org/10.1371/journal.pone.0283589.t003>

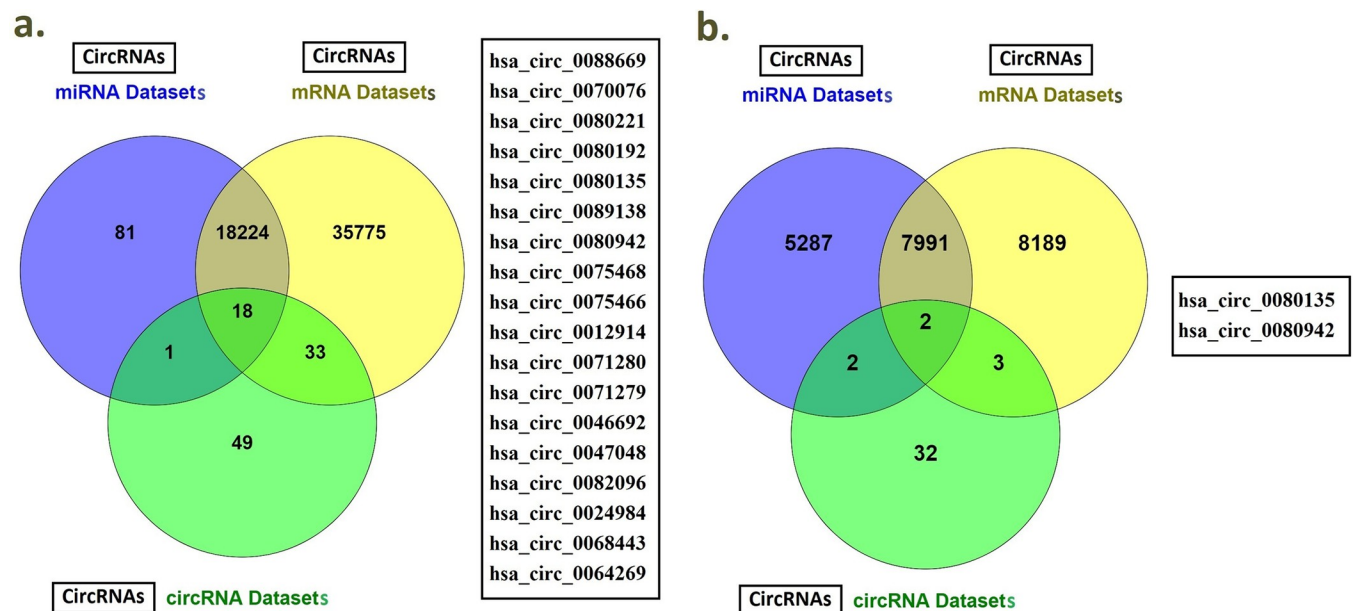

**Fig 3. Venn diagram of overlapped differentially expressed circRNAs among circRNAs of circRNA datasets, miRNA datasets and mRNA datasets.** a) Overlapped differentially expressed circRNAs among circRNAs of circRNA datasets, miRNA datasets and mRNA datasets (whole genes). b) Overlapped differentially expressed circRNAs among circRNAs of circRNA datasets, miRNA datasets and mRNA datasets (cytokine storm related mRNAs).

<https://doi.org/10.1371/journal.pone.0283589.g003>

Following that, the target genes of differentially expressed miRNAs were retrieved from miRDB, miRWalk 2.0, miRTarBase, and TargetScan 7.0 web-servers. Results revealed 77722 target genes for differentially expressed miRNAs. Further analysis revealed 38937 circRNAs have binding sites for respective differentially expressed miRNAs.

### Differentially expressed mRNA

Fifteen different datasets of mRNA expression profiles were retrieved from the GEO database and data mining tools. Datasets includes GSE19137, GSE166552, PRJCA002617, Chi et al., 2020, Lin et al., 2020, Chen et al., 2020a, Chen et al., 2020b, Blanco-Melo et al., 2020, Liu et al., 2020, Del Valle et al., 2020, Qin et al., 2020, Yang et al., 2020, Farr et al., 2021, Dhar et al., 2021 and Huang et al., 2020b. GSE19137 dataset revealed 171 dysregulated mRNAs. Another dataset PRJCA002617 revealed 30 dysregulated mRNAs. 25 dysregulated mRNAs were identified in GSE166552 dataset. Dataset of Chi et al., 2020 revealed 11 dysregulated mRNAs. Another dataset of Lin et al., 2020 revealed 6 dysregulated mRNAs. 6 dysregulated mRNAs were identified in Chen et al., 2020a dataset. Chen et al., 2020b dataset revealed 2 dysregulated mRNAs. In addition, 8 dysregulated mRNAs were identified in Blanco-Melo et al., 2020 dataset. Liu et al., 2020 dataset revealed 4 dysregulated mRNAs. Furthermore, another dataset Del Valle et al., 2020 revealed 3 dysregulated mRNAs. Qin et al., 2020 dataset revealed 4 dysregulated mRNAs. In addition Yang et al., 2020, dataset revealed 14 dysregulated mRNAs. In another dataset by Farr et al., 2021, findings revealed 3 dysregulated mRNAs. In addition, Dhar et al., 2021 dataset revealed 6 dysregulated mRNAs. Furthermore, a dataset of Huang et al., 2020b revealed 8 dysregulated mRNAs. Comprehensive analysis of fifteen different datasets revealed a total of 301 differentially expressed mRNAs.

### Target miRNAs of differentially expressed circRNAs

Target analysis of differentially expressed circRNAs was performed. GSE166552 dataset revealed a total of 4316 miRNA targets having binding sites on differentially expressed

circRNAs. PRJCA002617 dataset revealed a total of 1516 miRNAs targets having binding sites on differentially expressed circRNAs. Comprehensive analysis of two datasets revealed 5832 miRNAs targets having binding sites on differential expressed circRNAs.

### **Target mRNAs of predicted miRNAs**

Comprehensive analysis of 5832 miRNAs targets having binding sites on differential expressed circRNAs revealed 704000 genes having binding sites for respective miRNAs.

### **Target mRNAs of differentially expressed miRNAs**

mRNA target analysis of differentially expressed miRNAs in McDonald et al., 2021 dataset, Demirci et al., 2021, Farr et al., 2021 dataset, Li et al., 2020 dataset, Chow et al., 2020 dataset, and Arora et al., 2020 dataset revealed 77722 target genes.

### **Target circRNAs of differentially expressed miRNAs**

Comprehensive analysis of differentially expressed miRNAs in McDonald et al., 2021 dataset, Demirci et al., 2021, Farr et al., 2021 dataset, Li et al., 2020 dataset, Chow et al., 2020 dataset, and Arora et al., 2020 dataset revealed 38937 target circRNAs.

### **Target miRNAs of differentially expressed mRNAs**

miRNA target analysis of differentially expressed mRNAs from GSE19137, GSE166552, PRJCA002617, Chi et al., 2020, Lin et al., 2020, Chen et al., 2020a, Chen et al., 2020b, Blanco-Melo et al., 2020, Liu et al., 2020, Del Valle et al., 2020, Qin et al., 2020, Yang et al., 2020, Farr et al., 2021, Dhar et al., 2021 and Huang et al., 2020b datasets revealed a total of 5109 miRNAs against differentially expressed mRNAs.

### **Target CircRNAs of predicted miRNAs**

Comprehensive analysis of 5109 predicted miRNAs against differentially expressed mRNAs revealed 858423 circRNAs having binding sites for respective miRNAs.

## **Analysis of SARS-CoV-2 induced cytokine storm related circRNA-miRNA-mRNA Axis**

Previous findings have revealed that research on therapeutic strategies which have the potential to counteract multiple cytokines and related signaling pathways involved in COVID-19 is the need of the hour to capitalize promising therapeutic approach. Here we analyzed 12 datasets in which authors have evaluated and studied cytokine expression profiles and signatures induced by SARS-CoV-2 (Table 4). We wanted to retrieve those circRNAs which can inhibit maximum number of cytokines induced by SARS-COV-2. Comprehensive analysis of datasets revealed a total of 74 differentially expressed mRNAs, all of which were found to be upregulated. After removing duplicates, 32 mRNAs were found to be dysregulated. miRNA target analysis of differentially expressed 32 mRNAs (IL-1 $\beta$ , IL2, IL4, IL-6, IL-7, IL-8, IL10, IL-12, IL-13, IL-17, IL-18, IL23, IL33, IL-37, IL-38, TNF- $\alpha$ , IFN- $\gamma$ , CCL2, CXCL6, CXCL8, CXCL10, IP-10, MIP-1A, MIP1-B, PDGF, MCP1, GM-CSF, M-CSF, G-CSF, FGF, HGF, TGF- $\beta$ ) revealed a total of 262 miRNAs against differentially expressed mRNAs. Comprehensive analysis of 262 predicted miRNAs against differentially expressed 32 mRNAs revealed 99419 circRNAs having binding sites for respective miRNAs.

Table 4. Datasets used for the analysis of SARS-CoV-2 related cytokines.

| Genes  | Study 1      |                | Study 2      |                | Study 3      |                | Study 4      |                | Study 5      |                | Study 6      |                | Study 7      |                | Study 8      |                | Study 9      |                | Study 10     |                | Study 11     |                | Study 12     |                |      |
|--------|--------------|----------------|--------------|----------------|--------------|----------------|--------------|----------------|--------------|----------------|--------------|----------------|--------------|----------------|--------------|----------------|--------------|----------------|--------------|----------------|--------------|----------------|--------------|----------------|------|
|        | up-regulated | down-regulated | up-regulated | down-regulated | up-regulated | down-regulated | up-regulated | down-regulated | up-regulated | down-regulated | up-regulated | down-regulated | up-regulated | down-regulated | up-regulated | down-regulated | up-regulated | down-regulated | up-regulated | down-regulated | up-regulated | down-regulated | up-regulated | down-regulated |      |
| IL-1β  | -            | -              | -            | -              | ✓            | -              | -            | -              | -            | -              | -            | -              | -            | -              | -            | -              | -            | -              | -            | -              | ✓            | -              | -            | -              |      |
| IL-2   | ✓            | -              | -            | -              | -            | -              | -            | -              | -            | -              | -            | -              | -            | -              | -            | -              | -            | -              | -            | -              | -            | -              | ✓            | -              |      |
| IL-4   | -            | -              | -            | -              | -            | -              | -            | -              | -            | -              | -            | -              | -            | -              | -            | -              | -            | -              | -            | -              | -            | -              | -            | -              |      |
| IL-6   | -            | ✓              | -            | -              | ✓            | -              | -            | -              | -            | -              | -            | -              | -            | -              | -            | -              | -            | -              | -            | -              | ✓            | -              | -            | -              |      |
| IL-7   | ✓            | -              | -            | -              | -            | -              | -            | -              | -            | -              | -            | -              | -            | -              | -            | -              | -            | -              | -            | -              | -            | -              | -            | -              |      |
| IL-8   | -            | -              | -            | -              | -            | -              | -            | -              | -            | -              | -            | -              | -            | -              | -            | -              | -            | -              | -            | -              | -            | -              | -            | -              |      |
| IL-10  | ✓            | -              | -            | -              | ✓            | -              | -            | -              | -            | -              | -            | -              | -            | -              | -            | -              | -            | -              | -            | -              | -            | -              | ✓            | -              |      |
| IL-12  | -            | -              | -            | -              | -            | -              | -            | -              | -            | -              | -            | -              | -            | -              | -            | -              | -            | -              | -            | -              | -            | -              | -            | -              |      |
| IL-13  | -            | -              | -            | -              | -            | -              | -            | -              | -            | -              | -            | -              | -            | -              | -            | -              | -            | -              | -            | -              | -            | -              | -            | -              |      |
| IL-17  | -            | -              | -            | -              | -            | -              | -            | -              | -            | -              | -            | -              | -            | -              | -            | -              | -            | -              | -            | -              | -            | -              | -            | -              |      |
| IL-18  | -            | -              | -            | -              | -            | -              | -            | -              | -            | -              | -            | -              | -            | -              | -            | -              | -            | -              | -            | -              | -            | -              | -            | -              |      |
| IL-23  | -            | -              | -            | -              | -            | -              | -            | -              | -            | -              | -            | -              | -            | -              | -            | -              | -            | -              | -            | -              | -            | -              | -            | -              |      |
| IL-33  | -            | -              | -            | -              | -            | -              | -            | -              | -            | -              | -            | -              | -            | -              | -            | -              | -            | -              | -            | -              | -            | -              | -            | -              |      |
| IL-37  | -            | -              | -            | -              | -            | -              | -            | -              | -            | -              | -            | -              | -            | -              | -            | -              | -            | -              | -            | -              | -            | -              | -            | -              |      |
| IL-38  | -            | -              | -            | -              | -            | -              | -            | -              | -            | -              | -            | -              | -            | -              | -            | -              | -            | -              | -            | -              | -            | -              | -            | -              |      |
| TNF-α  | ✓            | -              | -            | -              | ✓            | -              | -            | -              | -            | -              | -            | -              | -            | -              | -            | -              | -            | -              | -            | -              | -            | -              | -            | -              |      |
| IFN-γ  | -            | -              | -            | -              | ✓            | -              | -            | -              | -            | -              | -            | -              | -            | -              | -            | -              | -            | -              | -            | -              | -            | -              | -            | -              |      |
| CCL2   | -            | -              | -            | -              | -            | -              | -            | -              | -            | -              | -            | -              | -            | -              | -            | -              | -            | -              | -            | -              | -            | -              | -            | -              |      |
| CXCL16 | -            | -              | -            | -              | -            | -              | -            | -              | -            | -              | -            | -              | -            | -              | -            | -              | -            | -              | -            | -              | -            | -              | -            | -              |      |
| CXCL8  | -            | -              | -            | -              | -            | -              | -            | -              | -            | -              | -            | -              | -            | -              | -            | -              | -            | -              | -            | -              | -            | -              | -            | -              |      |
| CXCL10 | -            | -              | -            | -              | -            | -              | -            | -              | -            | -              | -            | -              | -            | -              | -            | -              | -            | -              | -            | -              | -            | -              | -            | -              |      |
| IP-10  | ✓            | -              | -            | -              | -            | -              | -            | -              | -            | -              | -            | -              | -            | -              | -            | -              | -            | -              | -            | -              | -            | -              | -            | -              |      |
| MIP-1A | ✓            | -              | -            | -              | -            | -              | -            | -              | -            | -              | -            | -              | -            | -              | -            | -              | -            | -              | -            | -              | -            | -              | -            | -              |      |
| MIP1-B | -            | -              | -            | -              | -            | -              | -            | -              | -            | -              | -            | -              | -            | -              | -            | -              | -            | -              | -            | -              | -            | -              | -            | -              |      |
| PDGF   | -            | -              | -            | -              | -            | -              | -            | -              | -            | -              | -            | -              | -            | -              | -            | -              | -            | -              | -            | -              | -            | -              | -            | -              |      |
| MCP1   | ✓            | -              | -            | -              | -            | -              | -            | -              | -            | -              | -            | -              | -            | -              | -            | -              | -            | -              | -            | -              | -            | -              | -            | -              |      |
| GM-CSF | -            | -              | -            | -              | -            | -              | -            | -              | -            | -              | -            | -              | -            | -              | -            | -              | -            | -              | -            | -              | -            | -              | -            | -              |      |
| M-CSF  | -            | -              | -            | -              | -            | -              | -            | -              | -            | -              | -            | -              | -            | -              | -            | -              | -            | -              | -            | -              | -            | -              | -            | -              |      |
| G-CSF  | ✓            | -              | -            | -              | -            | -              | -            | -              | -            | -              | -            | -              | -            | -              | -            | -              | -            | -              | -            | -              | -            | -              | -            | -              |      |
| FGF    | -            | -              | -            | -              | -            | -              | -            | -              | -            | -              | -            | -              | -            | -              | -            | -              | -            | -              | -            | -              | -            | -              | -            | -              |      |
| HGF    | -            | -              | -            | -              | -            | -              | -            | -              | -            | -              | -            | -              | -            | -              | -            | -              | -            | -              | -            | -              | -            | -              | -            | -              |      |
| TGF-β  | -            | -              | -            | -              | -            | -              | -            | -              | -            | -              | -            | -              | -            | -              | -            | -              | -            | -              | -            | -              | -            | -              | -            | -              |      |
|        | [45]         | [46]           | [46]         | [46]           | [42]         | [42]           | [46]         | [46]           | [42]         | [42]           | [32]         | [44]           | [44]         | [44]           | [41]         | [41]           | [40]         | [40]           | [40]         | [56]           | [56]         | [43]           | [43]         | [37]           | [37] |

<https://doi.org/10.1371/journal.pone.0283589.t004>

## Common circRNA-miRNA-mRNA pairs among circRNA, miRNA and mRNA datasets

Analysis of common circRNAs among circRNA, miRNA and mRNA datasets revealed two circRNAs including hsa\_circ\_0080942 and hsa\_circ\_0080135 (Fig 3). The two filtered circRNAs have binding sites for 86 miRNAs. These 86 miRNAs have binding sites for 15 cytokine storm related mRNAs including IL-1 $\beta$ , IL-7, IL-10, IL-12B, IL-13, IL-17A, IL-33, IFN- $\gamma$ , CCL2, CXCL6, CXCL8, CXCL10, MIP, FGF2, FGF14.

## Construction of circRNA-miRNA-mRNA networks

The circRNA-miRNA-mRNA network of hsa\_circ\_0080942 and hsa\_circ\_0080135 was visualized using the Cytoscape software. The hsa\_circ\_0080942 network included 47 miRNAs forming 88 pairs of circRNA-miRNA-mRNA axis. For instance, hsa\_circ\_0080942 is the ceRNA of hsa-miR-1183 targeting MIP, CXCL8, CXCL10, IL33, IL1B, IL10, IL17A, IL12B. Furthermore, hsa\_circ\_0080942 is the ceRNA of hsa-miR-486-3p targeting IL33, IL13, IL1B and IL7. The hsa\_circ\_0080135 network included 39 miRNAs forming 77 pairs of circRNA-miRNA-mRNA axis. For instance, hsa\_circ\_0080135 is the ceRNA of hsa-miR-885-3p targeting IL12B, IL1B, IL33, CXCL10 and MIP. Furthermore, hsa\_circ\_0080135 is the ceRNA of hsa-miR-769-3p targeting IL12B, IFNG, CXCL6 and CXCL8 (Fig 4) (Table 5).

## KEGG pathway and functional enrichment analysis

DAVID was used to conduct a KEGG pathway enrichment analysis to gain a better understanding of the differentially expressed genes' function (Fig 5) (Table 6). In order to screen

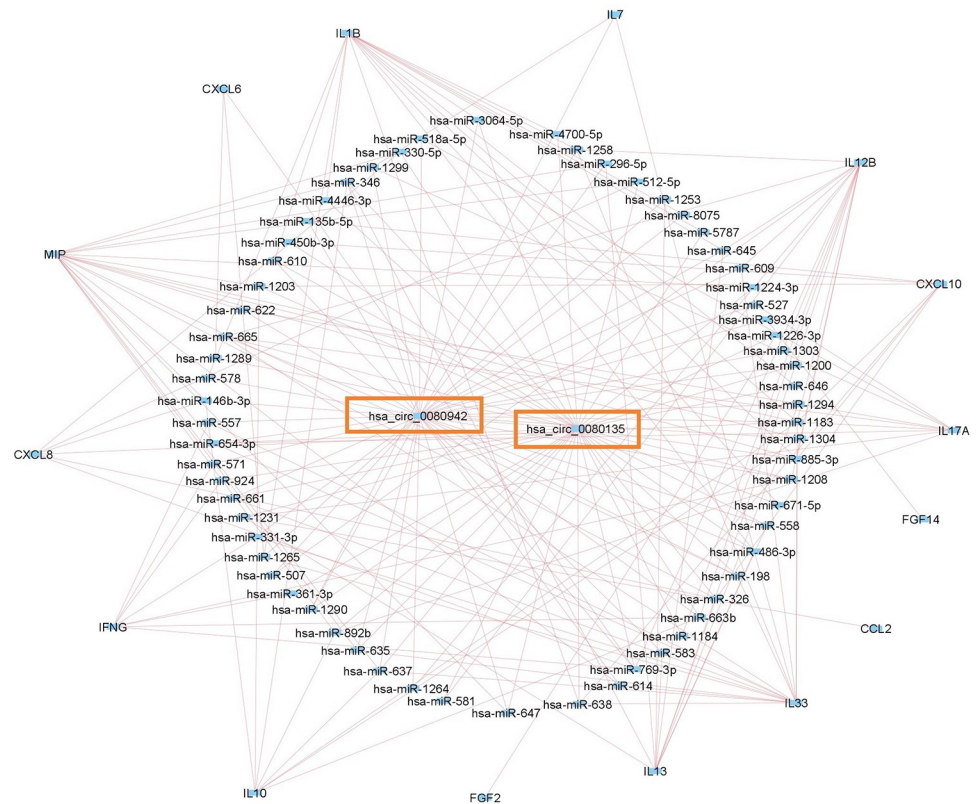

**Fig 4. The SARS-CoV-2 induced cytokine storm related circRNA-miRNA-mRNA network visualized using Cytoscape software.** The circRNA-miRNA-mRNA network contains 81 nodes and 205 edges.

<https://doi.org/10.1371/journal.pone.0283589.g004>

**Table 5. SARS-CoV-2 induced cytokine storm related circRNA–miRNA–mRNA regulatory axis.**

| CircRNA          | Parent Gene | miRNA           | mRNA                                        |
|------------------|-------------|-----------------|---------------------------------------------|
| hsa_circ_0080942 | PCLO        | hsa-miR-1183    | MIP/CXCL8/CXCL10/IL33/IL1B/IL10/IL17A/IL12B |
|                  |             | hsa-miR-486-3p  | IL33/IL13/IL1B/IL7                          |
|                  |             | hsa-miR-769-3p  | IL12B/IFNG/CXCL6/CXCL8                      |
|                  |             | hsa-miR-637     | IL33/IL10/MIP                               |
|                  |             | hsa-miR-1265    | IL1B/IL33/CXCL6                             |
|                  |             | hsa-miR-654-3p  | IL17A/IL33/MIP                              |
|                  |             | hsa-miR-665     | IL17A/IL33/IL12B                            |
|                  |             | hsa-miR-346     | IL13/IL10/MIP                               |
|                  |             | hsa-miR-1258    | IL12B/IL1B/IL33                             |
|                  |             | hsa-miR-645     | IL12B/IL13/IL1B                             |
|                  |             | hsa-miR-1303    | IL12B/IL10/MIP                              |
|                  |             | hsa-miR-198     | IL33/MIP                                    |
|                  |             | hsa-miR-614     | IL33/MIP                                    |
|                  |             | hsa-miR-635     | IL33/MIP                                    |
|                  |             | hsa-miR-331-3p  | IL33/IFNG                                   |
|                  |             | hsa-miR-557     | IL33/IFNG                                   |
|                  |             | hsa-miR-622     | IL17A/MIP                                   |
|                  |             | hsa-miR-1299    | IL17A/IL7                                   |
|                  |             | hsa-miR-296-5p  | IL13/MIP                                    |
|                  |             | hsa-miR-609     | IL12B/IL33                                  |
|                  |             | hsa-miR-1200    | IL12B/IL13                                  |
|                  |             | hsa-miR-1208    | IL12B/IFNG                                  |
|                  |             | hsa-miR-663b    | IL10/IFNG                                   |
|                  |             | hsa-miR-1224-3p | MIP                                         |
|                  |             | hsa-miR-513a-5p | MIP                                         |
|                  |             | hsa-miR-636     | MIP                                         |
|                  |             | hsa-miR-647     | MIP                                         |
|                  |             | hsa-miR-1290    | IL7                                         |
|                  |             | hsa-miR-661     | IL33                                        |
|                  |             | hsa-miR-578     | IL1B                                        |
|                  |             | hsa-miR-610     | IL1B                                        |
|                  |             | hsa-miR-671-5p  | IL1B                                        |
|                  |             | hsa-miR-518a-5p | IL17A                                       |
|                  |             | hsa-miR-527     | IL17A                                       |
|                  |             | hsa-miR-1253    | IL13                                        |
|                  |             | hsa-miR-1294    | IL13                                        |
|                  |             | hsa-miR-558     | IL13                                        |
|                  |             | hsa-miR-583     | IL13                                        |
|                  |             | hsa-miR-1264    | IL12B                                       |
|                  |             | hsa-miR-507     | IL12B                                       |
|                  |             | hsa-miR-571     | IFNG                                        |
|                  |             | hsa-miR-924     | IFNG                                        |
|                  |             | hsa-miR-1289    | CXCL6                                       |
|                  |             | hsa-miR-450b-3p | CXCL10                                      |
|                  |             | hsa-miR-135b-5p | CXCL10                                      |
|                  |             | hsa-miR-3934-3p | FGF14                                       |
|                  |             | hsa-miR-3064-5p | IL1B                                        |

(Continued)

Table 5. (Continued)

| CircRNA          | Parent Gene | miRNA           | mRNA                       |
|------------------|-------------|-----------------|----------------------------|
| hsa_circ_0080135 | TNS3        | hsa-miR-885-3p  | IL12B/IL1B/IL33/CXCL10/MIP |
|                  |             | hsa-miR-486-3p  | IL33/IL13/IL1B/IL7         |
|                  |             | hsa-miR-326     | IL13/CXCL8/CXCL10/MIP      |
|                  |             | hsa-miR-769-3p  | IL12B/IFNG/CXCL6/CXCL8     |
|                  |             | hsa-miR-637     | IL33/IL10/MIP              |
|                  |             | hsa-miR-638     | IL1B/IL33/CXCL10           |
|                  |             | hsa-miR-654-3p  | IL17A/IL33/MIP             |
|                  |             | hsa-miR-665     | IL17A/IL33/IL12B           |
|                  |             | hsa-miR-892b    | IL17A/IL10/MIP             |
|                  |             | hsa-miR-1231    | IL13/IL17A/CCL2            |
|                  |             | hsa-miR-346     | IL13/IL10/MIP              |
|                  |             | hsa-miR-146b-3p | IL10/CXCL8/MIP             |
|                  |             | hsa-miR-1203    | IL10/CXCL10/MIP            |
|                  |             | hsa-miR-198     | IL33/MIP                   |
|                  |             | hsa-miR-635     | IL33/MIP                   |
|                  |             | hsa-miR-1200    | IL12B/IL13                 |
|                  |             | hsa-miR-1208    | IL12B/IFNG                 |
|                  |             | hsa-miR-663b    | IL10/IFNG                  |
|                  |             | hsa-miR-330-5p  | CXCL8/MIP                  |
|                  |             | hsa-miR-512-5p  | CXCL8/MIP                  |
|                  |             | hsa-miR-1224-3p | MIP                        |
|                  |             | hsa-miR-647     | MIP                        |
|                  |             | hsa-miR-1290    | IL7                        |
|                  |             | hsa-miR-661     | IL33                       |
|                  |             | hsa-miR-610     | IL1B                       |
|                  |             | hsa-miR-646     | IL1B                       |
|                  |             | hsa-miR-671-5p  | IL1B                       |
|                  |             | hsa-miR-558     | IL13                       |
|                  |             | hsa-miR-1184    | IL12B                      |
|                  |             | hsa-miR-581     | IL12B                      |
|                  |             | hsa-miR-361-3p  | IFNG                       |
|                  |             | hsa-miR-924     | IFNG                       |
|                  |             | hsa-miR-1289    | CXCL6                      |
| hsa-miR-450b-3p  | CXCL10      |                 |                            |
| hsa-miR-3064-5p  | IL1B        |                 |                            |
| hsa-miR-4446-3p  | IL1B        |                 |                            |
| hsa-miR-4700-5p  | IL1B        |                 |                            |
| hsa-miR-5787     | IL1B        |                 |                            |
| hsa-miR-1226-3p  | FGF2        |                 |                            |

<https://doi.org/10.1371/journal.pone.0283589.t005>

core and hub genes as well as physical and functional associations, 203 differentially expressed genes were imported to STRING web-based tool. These 203 differentially expressed genes represent the results of the mRNA datasets analyzed in the current manuscript. The threshold condition was a confidence score  $\geq 0.4$ . The results of analyzed data were then imported into Cytoscape for visualization analysis, and node connectivity was calculated to screen for the central node (hub genes) of the network. Finally the relationship between hub genes and prioritized circRNAs were determined and analyzed. There were 203 nodes and 657 edges in the

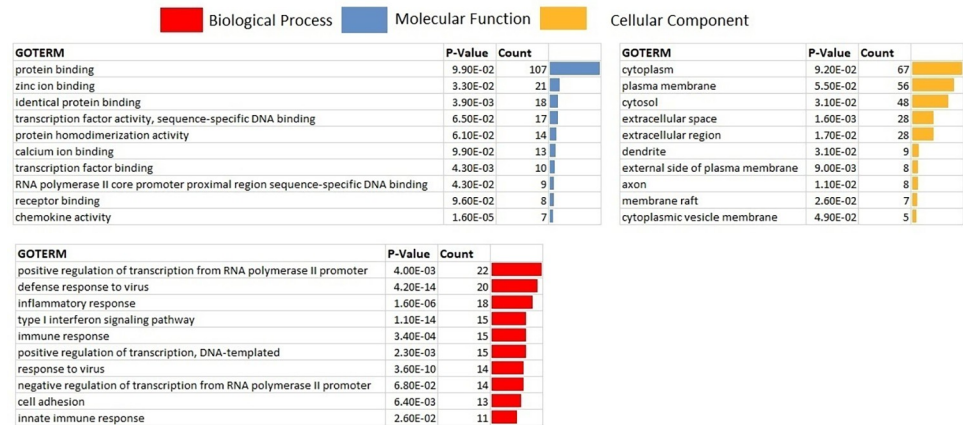

**Fig 5. Gene ontology analysis of differentially expressed genes.** Top GO terms with lowest P-values in cellular component, molecular function, and biological process were shown, respectively.

<https://doi.org/10.1371/journal.pone.0283589.g005>

PPI network. The cytoHubba plug-in in Cytoscape was used to search the list of top 10 genes from the PPI network with node degrees indicating hub DEGs, including STAT1, RSAD2, IFIT1, IFIT3, IFIT2, DDX58, OAS2, MX2, IFI44 and IFI44L (Fig 6). Module analysis using MCODE plug in revealed 6 modules; module 1 containing 25 nodes and 272 edges, module 2 containing 6 nodes and 11 edges, module 3 containing 5 nodes and 7 edges, module 4 containing 5 nodes and 3 edges, module 5 containing 3 nodes and 3 edges and module 6 containing 3 nodes and 3 edges.

### Pharmacogenomics analysis for hub genes

By exploring the website PharmGkb, genes indirectly targeted by two prioritized circRNAs were selected for Pharmacogenomics analysis to find some potential drugs. The results revealed that HMG-CoA reductase inhibitors (target: STAT1), simvastatin (target: STAT1), atorvastatin (target: STAT1), aspirin (target: STAT1), pravastatin (target: STAT1), rosuvastatin (target: STAT1), clomipramine (target: MIP), Imipramine (target: MIP), Mercaptopurine (target: MIP), trimipramine (target: MIP), diosmectite (target: CXCL10), canakinumab (target: IL-1B), anakinra (target: IL-1B), secukinumab (target: IL-17A), ixekizumab (target: IL-17A), and chloroquine (FGF2) might serve as potential therapeutic options for SARS-CoV-2 infection (Table 7). Many of these drugs have been approved by FDA against COVID-19 and previously been found to be effective in mitigating the effect of SARS-CoV-2, further increasing the

**Table 6. KEGG analysis of 15 cytokine storm related genes.**

| Sr. No | KEGG Pathway                          | Enrichment Score | P value | Cytokines Count |
|--------|---------------------------------------|------------------|---------|-----------------|
| 1      | Chemokine signaling pathway           | 4.33             | 4.6E-3  | 4               |
| 2      | Inflammatory bowel disease (IBD)      | 3.82             | 7.2E-8  | 6               |
| 3      | Rheumatoid arthritis                  | 3.82             | 3.6E-7  | 6               |
| 4      | Toll-like receptor signaling pathway  | 3.82             | 9.1E-4  | 4               |
| 5      | NOD-like receptor signaling pathway   | 3.82             | 4.8E-3  | 3               |
| 6      | TNF signaling pathway                 | 3.44             | 1.7E-2  | 3               |
| 7      | RIG-I-like receptor signaling pathway | 3.44             | 7.4E-3  | 3               |
| 8      | Herpes simplex infection              | 3.44             | 4.4E-3  | 4               |
| 9      | Influenza A                           | 3.44             | 3.6E-7  | 7               |

<https://doi.org/10.1371/journal.pone.0283589.t006>



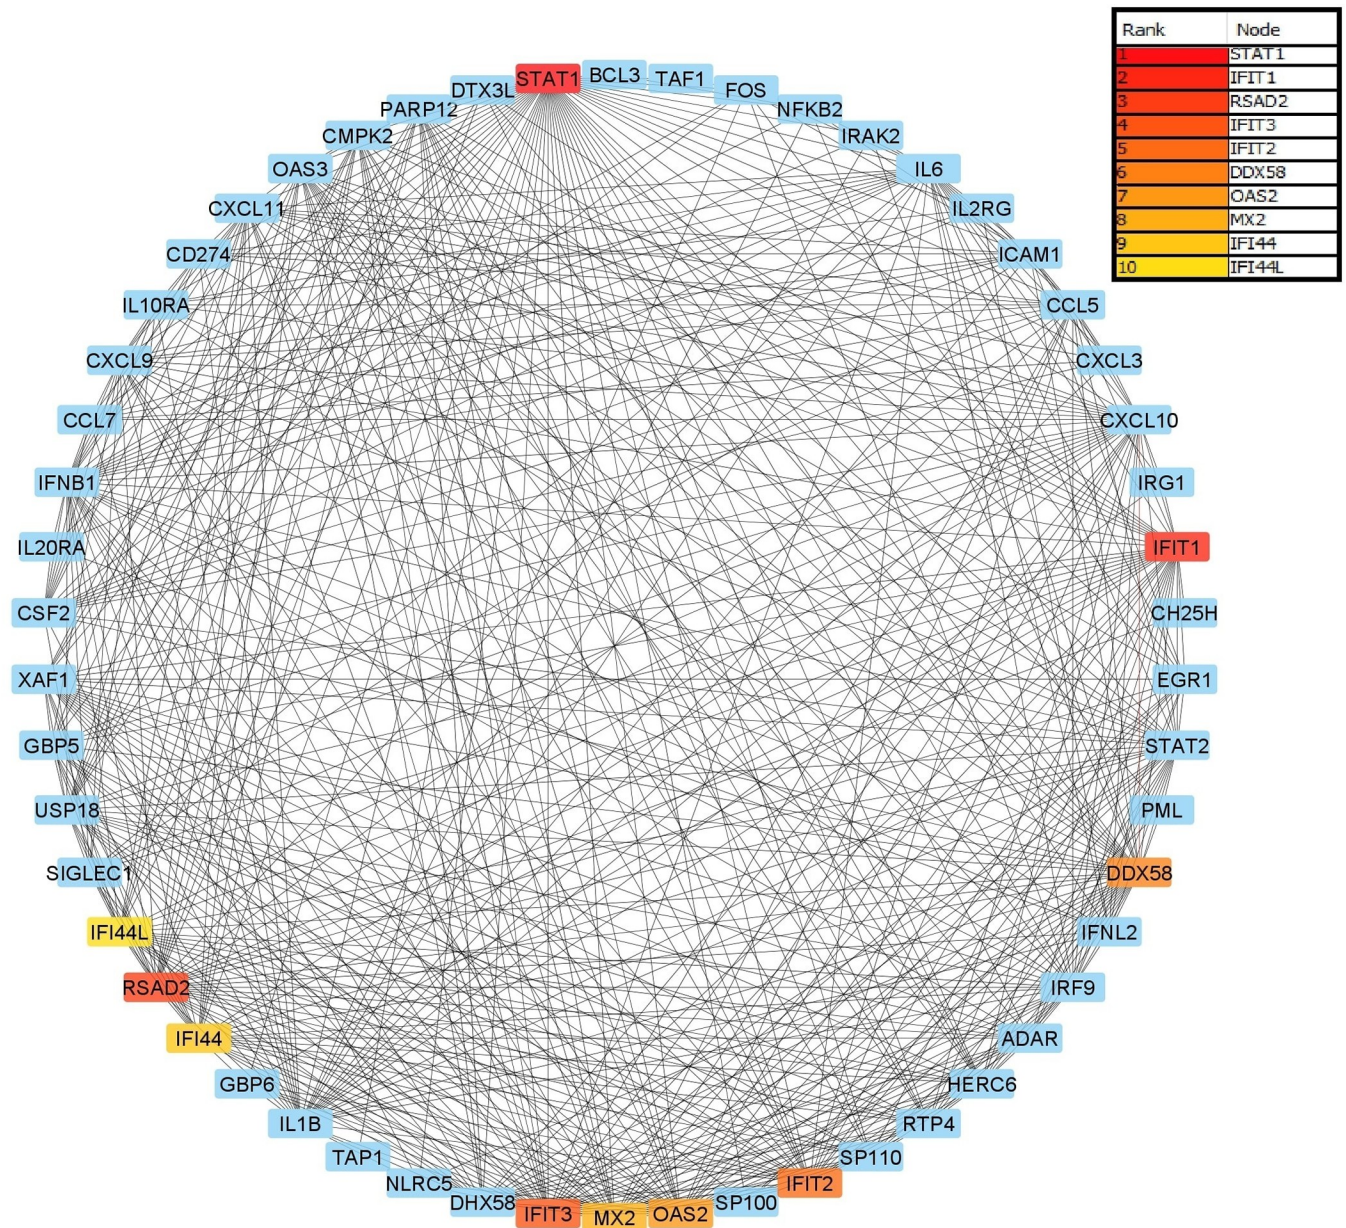

**Fig 6.** The cytoHubba plug-in in Cytoscape was used to search the list of top 10 genes from the PPI network with node degrees indicating hub differentially expressed genes, including STAT1, RSAD2, IFIT1, IFIT3, IFIT2, DDX58, OAS2, MX2, IFI44 and IFI44L.

<https://doi.org/10.1371/journal.pone.0283589.g006>

reliability of current study results. Study of Bergqvist et al., revealed negative association between Statin treatment and COVID-19 mortality [66]. Mercaptopurine, a purine analogue has been previously reported as a selective inhibitor of both MERS-CoV and SARS-CoV [67]. In another study, authors found that a tricyclic antidepressant trimipramine protected against SARS-CoV-2 induced cytopathic effect via inhibiting autophagy [68]. Moreover, Clomipramine was found to be effective in preventing neurological manifestations of SARS-CoV-2 Infection [69]. In a retrospective study, statins were found to have potential beneficial effects on mortality rates associated with SARS-CoV-2 infection [70]. Diosmectite, which is an aluminum-magnesium silicate adsorbent clay has been recommended for managing COVID-19.

Table 7. Drug targets and their association with prioritized circRNAs during SARS-CoV-2 infection.

| Drugs                                               | mRNAs  | miRNAs          | CircRNAs         |
|-----------------------------------------------------|--------|-----------------|------------------|
| Clomipramine Imipramine Mercaptopurine Trimipramine | MIP    | hsa-miR-1183    | hsa_circ_0080942 |
|                                                     |        | hsa-miR-637     |                  |
|                                                     |        | hsa-miR-654-3p  |                  |
|                                                     |        | hsa-miR-346     |                  |
|                                                     |        | hsa-miR-1303    |                  |
|                                                     |        | hsa-miR-198     |                  |
|                                                     |        | hsa-miR-614     |                  |
|                                                     |        | hsa-miR-635     |                  |
|                                                     |        | hsa-miR-622     |                  |
|                                                     |        | hsa-miR-296-5p  |                  |
|                                                     |        | hsa-miR-1224-3p |                  |
|                                                     |        | hsa-miR-513a-5p |                  |
|                                                     |        | hsa-miR-636     |                  |
|                                                     |        | hsa-miR-647     |                  |
| hmg coa reductase inhibitors                        | STAT1  |                 |                  |
| simvastatin                                         |        |                 |                  |
| atorvastatin                                        |        |                 |                  |
| aspirin                                             |        |                 |                  |
| pravastatin                                         |        |                 |                  |
| rosuvastatin                                        |        |                 |                  |
| Diosmectite                                         | CXCL10 | hsa-miR-1183    | hsa_circ_0080942 |
|                                                     |        | hsa-miR-450b-3p |                  |
|                                                     |        | hsa-miR-135b-5p |                  |
| Canakinumab Anakinra                                | IL-1 B | hsa-miR-1183    | hsa_circ_0080942 |
|                                                     |        | hsa-miR-486-3p  |                  |
|                                                     |        | hsa-miR-1265    |                  |
|                                                     |        | hsa-miR-1258    |                  |
|                                                     |        | hsa-miR-645     |                  |
|                                                     |        | hsa-miR-578     |                  |
|                                                     |        | hsa-miR-610     |                  |
|                                                     |        | hsa-miR-671-5p  |                  |
| hsa-miR-3064-5p                                     |        |                 |                  |
| Secukinumab Ixekizumab                              | IL-17A | hsa-miR-1183    | hsa_circ_0080942 |
|                                                     |        | hsa-miR-486-3p  |                  |
|                                                     |        | hsa-miR-654-3p  |                  |
|                                                     |        | hsa-miR-665     |                  |
|                                                     |        | hsa-miR-622     |                  |
|                                                     |        | hsa-miR-1299    |                  |
|                                                     |        | hsa-miR-518a-5p |                  |
|                                                     |        | hsa-miR-527     |                  |
| Chloroquine                                         | FGF2   | hsa-miR-1226-3p | hsa_circ_0080135 |

<https://doi.org/10.1371/journal.pone.0283589.t007>

Exposure of this drug inhibited CXCL10 secretion and NF-kappaB activation [71]. Moreover both anakinra (by blocking IL-1 receptor) and canakinumab (by blocking the IL-1 signaling) can potentially interrupt autoinflammatory loop during SARS-CoV-2 infection. Another drug Chloroquine has been reported to inhibit FGF2-induced mitogenic activity [72].

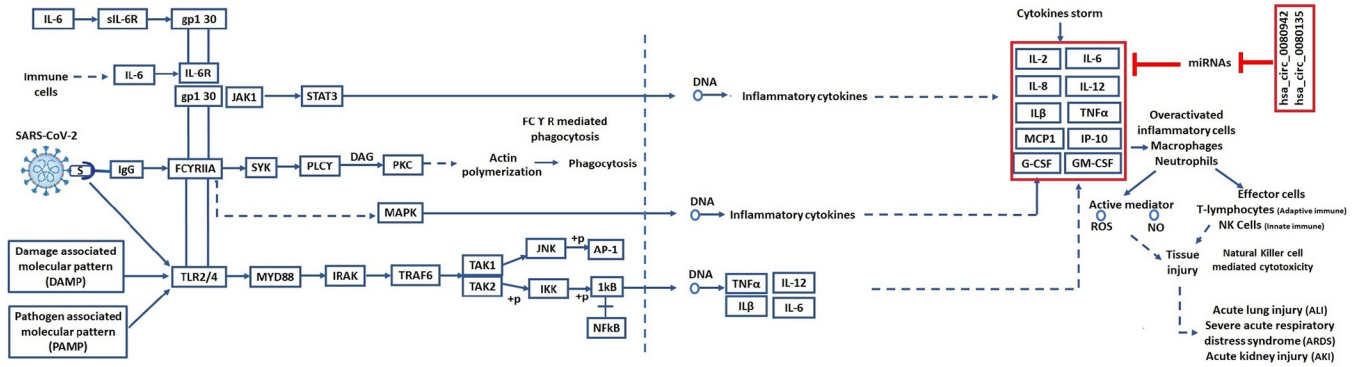

**Fig 7. Pathway analysis of COVID-19 pathogenesis (KEGG pathway ID: map05171).** Highlighted genes are targets of miRNAs and indirect targets of two prioritized circRNAs.

<https://doi.org/10.1371/journal.pone.0283589.g007>

Multiple drugs approved right now for the treatment of SARS-CoV2 infection have targets been regulated by two prioritized circRNAs. Instead of using multiple drugs targeting multiple mRNAs, we can utilize single circRNA regulating multiple disease related mRNAs. We have also retrieved the Coronavirus disease-COVID-19 pathway from KEGG database with pathway ID: map05171. This pathway illustrates those cytokines that are part of cytokine syndrome induced during the SARS-CoV-2 infection. Further we have highlighted the target cytokines of prioritized miRNAs and circRNAs of current study to decipher the importance of future therapeutic avenues using circRNAs (Fig 7).

### Discussion

A number of studies have highlighted significant involvement of circRNA-miRNA-mRNA regulatory axis in signaling pathways of human diseases [24]. CircRNA, a type of highly conserved endogenous RNA, has been shown to operate as a "sponge" that absorbs matching miRNA by engaging with miRNA binding sites and therefore indirectly regulates gene expression [73]. In the current approach (Fig 2), we have systematically analyzed datasets to explore circRNA, miRNA, and mRNA expression profiles during SARS-CoV-2 infection. Findings of our study revealed differential expression profiles of circRNAs, mRNAs and miRNAs during SARS-CoV-2 infection. Functional analysis was performed along with construction of protein-protein interaction network and circRNA-miRNA-mRNA network. Final circRNA-miRNA-mRNA network was constructed based on cytokine storm related circRNAs forming a total of 165 circRNA-miRNA-mRNA pairs. Our investigation of the triple regulatory networks of circRNA-miRNA-mRNA revealed two circRNAs including hsa\_circ\_0080942 and hsa\_circ\_0080135 as a potential theranostic agents for SARS-CoV-2 infection. Further these results have shed light on the complex regulatory mechanism of circRNAs in SARS-CoV-2.

Analysis of miRNA targets of prioritized circRNAs revealed significant role of respective miRNAs in SARS-CoV-2 pathogenesis. In one of the study, the expression level of hsa-miR-135b-5 was found to be down-regulated in lung epithelial cells infected with SARS-CoV-2. The authors concluded that, lowering the expression level of host miRNAs is expected to make the respiratory epithelium more susceptible to infection where as increasing the expression levels of host miRNAs might mitigate coronavirus infection [34]. In another study, miR-8066 was found to be associated with cytokine storm which is one of the major COVID-19 problem [74]. Authors revealed that miR-8066 significantly impacted cytokine-cytokine receptor pathway. Moreover, miR-3934-3p have been found to down-regulate TGFBR1 and SMAD3 which are critical players for lung fibrosis and have been previously reported in SARS-CoV-related

cases [74]. The work of Peng et al., revealed regulatory role of miR-486-5p in influenza virus replication. The authors proposed that designing miRNA-based therapies against viral infection might be a useful strategy as increased expression of miRNAs elicits effective antiviral defenses against influenza A viruses [75]. Sang et al., revealed that down-regulation of miR-637 was the causative factor of Pulmonary hypertension [76]. In another work, the authors found that suppressing the level of cellular miRNA hsa-miR-1258 enhanced viral particle production by 2.99 folds [77]. Another study revealed that Coxsackievirus A16 induced down-regulation of miR-1303 promoted the disruption of blood brain barrier integrity via miR-1303-MMP axis [78]. The work performed by Sung et al., revealed anti-HIV-1 activity of miR-198 via targeting cyclin T1 [79]. Bagasra et al., found down-regulation of has-miR-5787 in Zika virus infected neuronal cell line [80]. A number of other studies have revealed down-regulation of miRNA targets of prioritized circRNAs in viral infections and other diseases. Targeting circRNAs as a therapeutic approach might seem feasible strategy as single circRNA can target multiple miRNAs.

Further we also analyzed hub genes and cytokine storm related genes of prioritized circRNAs. Orumaa and co-authors revealed that severity of COVID-19 is linked to cytokine storm, which occurs when levels of inflammatory mediators such as IL-7, IL-10, and MIP are up-regulated [81]. Hassan et al., revealed the connection of IL-17 to critically sick patients infected with SARS-CoV-2 [82]. [83] study showed that over-expression of IL1B could be impacted by up-regulation of IRF8 and MYD88 [83]. The pro-inflammatory cytokine IL1B, which encodes IL-1, is one of the key mediators in inducing innate immune response-mediated inflammation in COVID-19 patients' lungs. In one of the study, Gupta et al., showed that activation of the cytokines including CXCL6, CXCL8 and CXCL10 is a distinctive profile of cytokine response in COVID-19 patients [84]. In another study, authors found association between increased level of FGF2 and patients with severe COVID-19 [85]. The work performed by Donlan et al., discovered that IL-13 levels in severe COVID-19 patients requiring ICU and/or mechanical ventilation rose from day 5 to day 20 of illness. These findings suggest that IL-13 is a key component of the host's response to SARS-CoV-2 infection and may be driving factor for severe illness [86]. A previous study found that seriously affected COVID-19 patients had an increased level of STAT1 and IRF9 [87]. Work of Giovannoni and coauthors revealed increased expression levels of RSAD2 in COVID-19 and found substantial correlation of RSAD2 with viral load [88]. Moreover another study revealed increased level of DDX58 in COVID-19-positive patients [89]. Another study found increased levels of IFI27 and OAS2 in COVID-19 patients [90].

Integrative analysis performed by Lu and coauthors revealed regulatory activities of circRNAs and their particular interaction with other RNAs via circRNA-miRNA-mRNA regulatory axis during Hantavirus infection [91]. In addition various recent study showed that circRNAs have been shown to bind to miRNAs and serve as natural miRNA sponges, influencing the activities of associated miRNAs and the gene expressions controlled by miRNAs [92]. Prioritized circRNAs includes hsa\_circ\_0080942 and hsa\_circ\_0080135. The hsa\_circ\_0080942 network included 47 miRNAs and 15 cytokine storm related genes forming 88 pairs of circRNA-miRNA-mRNA axis. For instance, hsa\_circ\_0080942 is the ceRNA of hsa-miR-1183 targeting MIP, CXCL8, CXCL10, IL33, IL1B, IL10, IL17A, IL12B. Furthermore, hsa\_circ\_0080942 is the ceRNA of hsa-miR-486-3p targeting IL33, IL13, IL1B and IL7. The hsa\_circ\_0080135 network included 39 miRNAs and 15 cytokine storm related genes forming 77 pairs of circRNA-miRNA-mRNA axis. For instance, hsa\_circ\_0080135 is the ceRNA of hsa-miR-885-3p targeting IL12B, IL1B, IL33, CXCL10 and MIP. Furthermore, hsa\_circ\_0080135 is the ceRNA of hsa-miR-769-3p targeting IL12B, IFNG, CXCL6 and CXCL8.

Via targeting two prioritized circRNAs, maximum number of cytokines dysregulated during SARS-CoV-2 infection can be targeted.

Furthermore Pharmacogenomics analysis was performed to retrieve some potentials therapeutic options for SARS-CoV-2 infection. Many of these drugs were previously found to be effective in mitigating the effect of SARS-CoV-2. Study of Bergqvist et al., revealed negative association between Statin treatment and COVID-19 mortality [66]. Mercaptopurine, a purine analogue has been previously reported as a selective inhibitor of both MERS-CoV and SARS-CoV [67]. In another study, authors found that a tricyclic antidepressant trimipramine protected against SARS-CoV-2 induced cytopathic effect via inhibiting autophagy [68]. Moreover, Clomipramine was found to be effective in preventing neurological manifestations of SARS-CoV-2 Infection [69]. In a retrospective study, statins were found to have potential beneficial effects on mortality rates associated with SARS-CoV-2 infection [70].

Another important consideration is that there are variety of conceptually different approaches for inferring and analyzing these datasets. Many comparisons have been conducted to determine which one is most suitable and reliable. The problem is that the results of such technical comparisons depend crucially on the studied conditions, including; type of the data, number of samples, amount of noise, experimental design, type of the underlying interaction structure and how you are measuring the error. For this reason it is unlikely that there is one “right” method that fits all different biological, technical and experimental design conditions best. It is also highly unlikely that there is just one method that outperforms all others for all conditions. In the current study, the construction of circRNA/miRNA/mRNA regulatory networks and the prediction of therapeutic drugs were all relying on a series of bioinformatics algorithms and databases. Still a large number of experiments are needed to verify the accuracy of these prediction conclusions. In addition, in the choice of differentially expressed RNAs, the selection criteria with higher credibility are adopted. Most reliable and reasonable algorithms were selected, but random errors and selection bias cannot be avoided.

Previous studies have indicated that circRNA is a type of high-efficiency competing endogenous RNA (ceRNA) and operate as part of ceRNA regulatory networks. It can regulate the expression level of multiple target genes by exerting a miRNA sequestering effect. This work along with other recent studies suggests that by inhibiting disease related circRNAs might present a new generation of versatile and adjustable RNA therapeutics with significant potential.

Ongoing clinical trials for the treatment of COVID-19 have proposed different therapeutic options including various drugs, monoclonal antibodies, immunoglobulin therapy, convalescent plasma therapy and cell therapy. However, at present, effects, safety, and efficacy of current treatment strategies are still uncertain and therefore more prospective clinical studies are needed in the future for further evaluation [93, 94]. Research on therapeutic strategies which have the potential to counteract multiple cytokines and related signaling pathways involved in COVID-19 is the need of the hour to capitalize promising therapeutic approach. Targeting prioritized circRNAs might provide attractive treatment option. Since circRNA is an upstream regulator of miRNA and mRNA, it may be possible to develop a circRNA–miRNA–mRNA panel, possibly including the hsa\_circ\_0080942 and hsa\_circ\_0080135 described in this work, for clinical applications as potential theranostic agents in SARS-CoV-2 infection.

## Author Contributions

**Conceptualization:** Faryal Mehwish Awan, Burton B. Yang.

**Data curation:** Hassan Ayaz, Nouman Aslam, Badr Alzahrani, Muhammad Arif.

**Formal analysis:** Hassan Ayaz, Nouman Aslam, Faryal Mehwish Awan, Rabea Basri.

**Funding acquisition:** Badr Alzahrani, Sadiq Noor Khan.

**Methodology:** Hassan Ayaz, Nouman Aslam, Faryal Mehwish Awan, Rabea Basri, Bisma Rauff, Badr Alzahrani, Aqsa Ikram, Ayesha Obaid, Anam Naz, Azhar Nazir.

**Resources:** Sadiq Noor Khan.

**Supervision:** Faryal Mehwish Awan.

**Validation:** Faryal Mehwish Awan, Burton B. Yang.

**Visualization:** Rabea Basri, Bisma Rauff, Badr Alzahrani, Muhammad Arif, Aqsa Ikram, Ayesha Obaid, Anam Naz.

**Writing – original draft:** Hassan Ayaz, Nouman Aslam, Faryal Mehwish Awan, Rabea Basri, Bisma Rauff, Muhammad Arif, Aqsa Ikram, Ayesha Obaid, Anam Naz, Azhar Nazir.

**Writing – review & editing:** Faryal Mehwish Awan, Sadiq Noor Khan, Burton B. Yang.

## References

1. Cella E, Benedetti F, Fabris S, Borsetti A, Pezzuto A, Ciotti M, et al. SARS-CoV-2 lineages and sub-lineages circulating worldwide: a dynamic overview. *Chemotherapy*. 2021;1–5. <https://doi.org/10.1159/000515340> PMID: 33735881
2. Shah VK, Fimal P, Alam A, Ganguly D, Chattopadhyay S. Overview of immune response during SARS-CoV-2 infection: lessons from the past. *Frontiers in immunology*. 2020; 11:1949. <https://doi.org/10.3389/fimmu.2020.01949> PMID: 32849654
3. Hu B, Huang S, Yin L. The cytokine storm and COVID-19. *Journal of medical virology*. 2021; 93(1):250–6. <https://doi.org/10.1002/jmv.26232> PMID: 32592501
4. Azkur AK, Akdis M, Azkur D, Sokolowska M, van de Veen W, Brügggen MC, et al. Immune response to SARS-CoV-2 and mechanisms of immunopathological changes in COVID-19. *Allergy*. 2020; 75(7):1564–81. <https://doi.org/10.1111/all.14364> PMID: 32396996
5. Henzinger H, Barth DA, Klec C, Pichler M. Non-coding RNAs and SARS-related coronaviruses. *Viruses*. 2020; 12(12):1374. <https://doi.org/10.3390/v12121374> PMID: 33271762
6. Shirahama S, Miki A, Kaburaki T, Akimitsu N. Long non-coding RNAs involved in pathogenic infection. *Frontiers in Genetics*. 2020; 11:454. <https://doi.org/10.3389/fgene.2020.00454> PMID: 32528521
7. Skalsky RL, Cullen BR. Viruses, microRNAs, and host interactions. *Annual review of microbiology*. 2010; 64:123–41. <https://doi.org/10.1146/annurev.micro.112408.134243> PMID: 20477536
8. Wang P. The opening of pandora's box: An emerging role of long noncoding RNA in viral infections. *Frontiers in immunology*. 2019; 9:3138. <https://doi.org/10.3389/fimmu.2018.03138> PMID: 30740112
9. Winterling C, Koch M, Koepfel M, Garcia-Alcalde F, Karlas A, Meyer TF. Evidence for a crucial role of a host non-coding RNA in influenza A virus replication. *RNA biology*. 2014; 11(1):66–75. <https://doi.org/10.4161/rna.27504> PMID: 24440876
10. Fortes P, Morris KV. Long noncoding RNAs in viral infections. *Virus research*. 2016; 212:1–11. <https://doi.org/10.1016/j.virusres.2015.10.002> PMID: 26454188
11. Girardi E, López P, Pfeffer S. On the importance of host microRNAs during viral infection. *Frontiers in Genetics*. 2018; 9:439. <https://doi.org/10.3389/fgene.2018.00439> PMID: 30333857
12. Esteller M. Non-coding RNAs in human disease. *Nature reviews genetics*. 2011; 12(12):861–74. <https://doi.org/10.1038/nrg3074> PMID: 22094949
13. Sullivan CS, Ganem D. MicroRNAs and viral infection. *Molecular cell*. 2005; 20(1):3–7. <https://doi.org/10.1016/j.molcel.2005.09.012> PMID: 16209940
14. Tycowski KT, Guo YE, Lee N, Moss WN, Vallery TK, Xie M, et al. Viral noncoding RNAs: more surprises. *Genes & development*. 2015; 29(6):567–84. <https://doi.org/10.1101/gad.259077.115> PMID: 25792595
15. Auvinen E. Diagnostic and prognostic value of MicroRNA in viral diseases. *Molecular diagnosis & therapy*. 2017; 21(1):45–57. <https://doi.org/10.1007/s40291-016-0236-x> PMID: 27682074

16. Chen L, Zhou Y, Li H. LncRNA, miRNA and lncRNA-miRNA interaction in viral infection. *Virus Research*. 2018; 257:25–32. <https://doi.org/10.1016/j.virusres.2018.08.018> PMID: 30165080
17. Wu Y, Zhao T, Deng R, Xia X, Li B, Wang X. A study of differential circRNA and lncRNA expressions in COVID-19-infected peripheral blood. *Scientific reports*. 2021; 11(1):1–14.
18. He AT, Liu J, Li F, Yang BB. Targeting circular RNAs as a therapeutic approach: current strategies and challenges. *Signal Transduction and Targeted Therapy*. 2021; 6(1):1–14.
19. Nahand JS, Jamshidi S, Hamblin MR, Mahjoubin-Tehran M, Vosough M, Jamali M, et al. Circular RNAs: new epigenetic signatures in viral infections. *Frontiers in microbiology*. 2020; 11:1853. <https://doi.org/10.3389/fmicb.2020.01853> PMID: 32849445
20. Sun J, Li B, Shu C, Ma Q, Wang J. Functions and clinical significance of circular RNAs in glioma. *Molecular cancer*. 2020; 19(1):1–18.
21. Mo Y, Liu Y, Lu A, Zhang H, Tang L. Role of circRNAs in viral infection and their significance for diagnosis and treatment. *International Journal of Molecular Medicine*. 2021; 47(5):1–12.
22. Awan FM, Yang BB, Naz A, Hanif A, Ikram A, Obaid A, et al. The emerging role and significance of circular RNAs in viral infections and antiviral immune responses: possible implication as theranostic agents. *RNA biology*. 2021; 18(1):1–15. <https://doi.org/10.1080/15476286.2020.1790198> PMID: 32615049
23. Su Q, Lv X. Revealing new landscape of cardiovascular disease through circular RNA-miRNA-mRNA axis. *Genomics*. 2020; 112(2):1680–5. <https://doi.org/10.1016/j.ygeno.2019.10.006> PMID: 31626900
24. Rong D, Sun H, Li Z, Liu S, Dong C, Fu K, et al. An emerging function of circRNA-miRNAs-mRNA axis in human diseases. *Oncotarget*. 2017; 8(42):73271. <https://doi.org/10.18632/oncotarget.19154> PMID: 29069868
25. Su Y, Yi Y, Li L, Chen C. circRNA-miRNA-mRNA network in age-related macular degeneration: from construction to identification. *Experimental Eye Research*. 2021; 203:108427. <https://doi.org/10.1016/j.exer.2020.108427> PMID: 33383027
26. Yu C-Y, Kuo H-C. The emerging roles and functions of circular RNAs and their generation. *Journal of biomedical science*. 2019; 26(1):1–12.
27. Arora S, Singh P, Dohare R, Jha R, Syed MA. Unravelling host-pathogen interactions: ceRNA network in SARS-CoV-2 infection (COVID-19). *Gene*. 2020; 762:145057. <https://doi.org/10.1016/j.gene.2020.145057> PMID: 32805314
28. Edgar R, Domrachev M, Lash AE. Gene Expression Omnibus: NCBI gene expression and hybridization array data repository. *Nucleic acids research*. 2002; 30(1):207–10. <https://doi.org/10.1093/nar/30.1.207> PMID: 11752295
29. Clough E, Barrett T. The gene expression omnibus database. *Statistical genomics*: Springer; 2016. p. 93–110.
30. Yang M, Qi M, Xu L, Huang P, Wang X, Sun J, et al. Differential host circRNA expression profiles in human lung epithelial cells infected with SARS-CoV-2. *Infection, Genetics and Evolution*. 2021; 93:104923. <https://doi.org/10.1016/j.meegid.2021.104923> PMID: 34004360
31. McDonald JT, Enguita FJ, Taylor D, Griffin RJ, Priebe W, Emmett MR, et al. Role of miR-2392 in driving SARS-CoV-2 infection. *Cell reports*. 2021; 37(3):109839. <https://doi.org/10.1016/j.celrep.2021.109839> PMID: 34624208
32. Farr R, Rootes C, Rowntree L, Nguyen T, Hensen L, Kedzierski L, et al. Altered microRNA expression in COVID-19 patients enables identification of SARS-CoV-2 infection. 2021. <https://doi.org/10.1371/journal.ppat.1009759> PMID: 34320031
33. Li C, Hu X, Li L, Li Jh. Differential microRNA expression in the peripheral blood from human patients with COVID-19. *Journal of clinical laboratory analysis*. 2020; 34(10):e23590. <https://doi.org/10.1002/jcla.23590> PMID: 32960473
34. Chow JT-S, Salmena L. Prediction and analysis of SARS-CoV-2-targeting MicroRNA in human lung epithelium. *Genes*. 2020; 11(9):1002. <https://doi.org/10.3390/genes11091002> PMID: 32858958
35. Demirci YM, Demirci MDS. Circular RNA–MicroRNA–MRNA interaction predictions in SARS-CoV-2 infection. *Journal of Integrative Bioinformatics*. 2021; 18(1):45–50. <https://doi.org/10.1515/jib-2020-0047> PMID: 33725751
36. Chi Y, Ge Y, Wu B, Zhang W, Wu T, Wen T, et al. Serum cytokine and chemokine profile in relation to the severity of coronavirus disease 2019 in China. *The Journal of infectious diseases*. 2020; 222(5):746–54. <https://doi.org/10.1093/infdis/jiaa363> PMID: 32563194
37. Lin L, Luo S, Qin R, Yang M, Wang X, Yang Q, et al. Long-term infection of SARS-CoV-2 changed the body's immune status. *Clinical Immunology*. 2020; 218:108524. <https://doi.org/10.1016/j.clim.2020.108524> PMID: 32659373

38. Chen G, Wu D, Guo W, Cao Y, Huang D, Wang H, et al. Clinical and immunological features of severe and moderate coronavirus disease 2019. *The Journal of clinical investigation*. 2020; 130(5):2620–9. <https://doi.org/10.1172/JCI137244> PMID: 32217835
39. Chen L, Liu H, Liu W, Liu J, Liu K, Shang J, et al. Analysis of clinical features of 29 patients with 2019 novel coronavirus pneumonia. *Zhonghua jie he he hu xi za zhi = Zhonghua jiehe he huxi zazhi = Chinese journal of tuberculosis and respiratory diseases*. 2020; 43:E005–E. <https://doi.org/10.3760/cma.j.issn.1001-0939.2020.0005> PMID: 32026671
40. Blanco-Melo D, Nilsson-Payant BE, Liu W-C, Uhl S, Hoagland D, Møller R, et al. Imbalanced host response to SARS-CoV-2 drives development of COVID-19. *Cell*. 2020; 181(5):1036–45. e9. <https://doi.org/10.1016/j.cell.2020.04.026> PMID: 32416070
41. Del Valle DM, Kim-Schulze S, Huang H-H, Beckmann ND, Nirenberg S, Wang B, et al. An inflammatory cytokine signature predicts COVID-19 severity and survival. *Nature medicine*. 2020; 26(10):1636–43. <https://doi.org/10.1038/s41591-020-1051-9> PMID: 32839624
42. Qin C, Zhou L, Hu Z, Zhang S, Yang S, Tao Y, et al. Dysregulation of immune response in patients with coronavirus 2019 (COVID-19) in Wuhan, China. *Clinical infectious diseases*. 2020; 71(15):762–8. <https://doi.org/10.1093/cid/ciaa248> PMID: 32161940
43. Yang Y, Shen C, Li J, Yuan J, Wei J, Huang F, et al. Plasma IP-10 and MCP-3 levels are highly associated with disease severity and predict the progression of COVID-19. *Journal of Allergy and Clinical Immunology*. 2020; 146(1):119–27. e4. <https://doi.org/10.1016/j.jaci.2020.04.027> PMID: 32360286
44. Dhar SK, Vishnupriyan K, Damodar S, Gujar S, Das M. IL-6 and IL-10 as predictors of disease severity in COVID-19 patients: results from meta-analysis and regression. *Heliyon*. 2021; 7(2):e06155. <https://doi.org/10.1016/j.heliyon.2021.e06155> PMID: 33553782
45. Huang C, Wang Y, Li X, Ren L, Zhao J, Hu Y, et al. Clinical features of patients infected with 2019 novel coronavirus in Wuhan, China. *The lancet*. 2020; 395(10223):497–506.
46. Liu J, Li S, Liu J, Liang B, Wang X, Wang H, et al. Longitudinal characteristics of lymphocyte responses and cytokine profiles in the peripheral blood of SARS-CoV-2 infected patients. *EBioMedicine*. 2020; 55:102763. <https://doi.org/10.1016/j.ebiom.2020.102763> PMID: 32361250
47. Liu M, Wang Q, Shen J, Yang BB, Ding X. Circbank: a comprehensive database for circRNA with standard nomenclature. *RNA biology*. 2019; 16(7):899–905. <https://doi.org/10.1080/15476286.2019.1600395> PMID: 31023147
48. Dudekula DB, Panda AC, Grammatikakis I, De S, Abdelmohsen K, Gorospe M. CircInteractome: a web tool for exploring circular RNAs and their interacting proteins and microRNAs. *RNA biology*. 2016; 13(1):34–42. <https://doi.org/10.1080/15476286.2015.1128065> PMID: 26669964
49. Kang J, Tang Q, He J, Li L, Yang N, Yu S, et al. RNAInter v4. 0: RNA interactome repository with redefined confidence scoring system and improved accessibility. *Nucleic acids research*. 2021. <https://doi.org/10.1093/nar/gkab997> PMID: 34718726
50. Wang X. miRDB: a microRNA target prediction and functional annotation database with a wiki interface. *Rna*. 2008; 14(6):1012–7. <https://doi.org/10.1261/ma.965408> PMID: 18426918
51. Dweep H, Gretz N. miRWalk2. 0: a comprehensive atlas of microRNA–target interactions. *Nature methods*. 2015; 12(8):697–. <https://doi.org/10.1038/nmeth.3485> PMID: 26226356
52. Huang H-Y, Lin Y-C-D, Li J, Huang K-Y, Shrestha S, Hong H-C, et al. miRTarBase 2020: updates to the experimentally validated microRNA–target interaction database. *Nucleic acids research*. 2020; 48(D1):D148–D54. <https://doi.org/10.1093/nar/gkz896> PMID: 31647101
53. Agarwal V, Bell GW, Nam J-W, Bartel DP. Predicting effective microRNA target sites in mammalian mRNAs. *elife*. 2015; 4:e05005. <https://doi.org/10.7554/eLife.05005> PMID: 26267216
54. Barrett T, Wilhite SE, Ledoux P, Evangelista C, Kim IF, Tomashevsky M, et al. NCBI GEO: archive for functional genomics data sets—update. *Nucleic acids research*. 2012; 41(D1):D991–D5. <https://doi.org/10.1093/nar/gks1193> PMID: 23193258
55. Huang H-Y, Lin Y-C-D, Cui S, Huang Y, Tang Y, Xu J, et al. miRTarBase update 2022: an informative resource for experimentally validated miRNA–target interactions. *Nucleic acids research*. 2022; 50(D1):D222–D30. <https://doi.org/10.1093/nar/gkab1079> PMID: 34850920
56. Chen Y, Wang X. miRDB: an online database for prediction of functional microRNA targets. *Nucleic acids research*. 2020; 48(D1):D127–D31. <https://doi.org/10.1093/nar/gkz757> PMID: 31504780
57. Snel B, Lehmann G, Bork P, Huynen MA. STRING: a web-server to retrieve and display the repeatedly occurring neighbourhood of a gene. *Nucleic acids research*. 2000; 28(18):3442–4. <https://doi.org/10.1093/nar/28.18.3442> PMID: 10982861
58. Shannon P, Markiel A, Ozier O, Baliga NS, Wang JT, Ramage D, et al. Cytoscape: a software environment for integrated models of biomolecular interaction networks. *Genome research*. 2003; 13(11):2498–504. <https://doi.org/10.1101/gr.1239303> PMID: 14597658



59. Saito R, Smoot ME, Ono K, Ruscheinski J, Wang P-L, Lotia S, et al. A travel guide to Cytoscape plugins. *Nature methods*. 2012; 9(11):1069–76. <https://doi.org/10.1038/nmeth.2212> PMID: 23132118
60. Chin C-H, Chen S-H, Wu H-H, Ho C-W, Ko M-T, Lin C-Y. cytoHubba: identifying hub objects and sub-networks from complex interactome. *BMC systems biology*. 2014; 8(4):1–7. <https://doi.org/10.1186/1752-0509-8-S4-S11> PMID: 25521941
61. Sherman BT, Tan Q, Collins JR, Alvord WG, Roayaei J, Stephens R, et al. The DAVID Gene Functional Classification Tool: a novel biological module-centric algorithm to functionally analyze large gene lists. *Genome biology*. 2007; 8(9):1–16.
62. Kanehisa M, Goto S. KEGG: kyoto encyclopedia of genes and genomes. *Nucleic acids research*. 2000; 28(1):27–30. <https://doi.org/10.1093/nar/28.1.27> PMID: 10592173
63. Thorn CF, Klein TE, Altman RB. PharmGKB: the pharmacogenomics knowledge base. *Pharmacogenomics*: Springer; 2013. p. 311–20.
64. Oliveros J, Venny. An interactive tool for comparing lists with Venn's diagrams. 2007–2015. 2016.
65. Aoki KF, Kanehisa M. Using the KEGG database resource. *Current protocols in bioinformatics*. 2005; 11(1):1.12. 1–1. 54. <https://doi.org/10.1002/0471250953.bi0112s11> PMID: 18428742
66. Bergqvist R, Ahlqvist VH, Lundberg M, Hergens M-P, Sundström J, Bell M, et al. HMG-CoA reductase inhibitors and COVID-19 mortality in Stockholm, Sweden: A registry-based cohort study. *PLoS medicine*. 2021; 18(10):e1003820. <https://doi.org/10.1371/journal.pmed.1003820> PMID: 34648516
67. Zhou Y, Hou Y, Shen J, Huang Y, Martin W, Cheng F. Network-based drug repurposing for novel coronavirus 2019-nCoV/SARS-CoV-2. *Cell discovery*. 2020; 6(1):1–18. <https://doi.org/10.1038/s41421-020-0153-3> PMID: 32194980
68. Chen CZ, Xu M, Pradhan M, Gorshkov K, Petersen JD, Straus MR, et al. Identifying SARS-CoV-2 entry inhibitors through drug repurposing screens of SARS-S and MERS-S pseudotyped particles. *ACS Pharmacology & Translational Science*. 2020; 3(6):1165–75.
69. Nobile B, Durand M, Olié E, Guillaume S, Molès J, Haffen E, et al. Clomipramine could be useful in preventing neurological complications of SARS-CoV-2 infection. *Journal of Neuroimmune Pharmacology*. 2020; 15(3):347–8. <https://doi.org/10.1007/s11481-020-09939-2> PMID: 32601885
70. Peymani P, Dehesh T, Aligolighasemabadi F, Sadeghdoust M, Kotfis K, Ahmadi M, et al. Statins in patients with COVID-19: a retrospective cohort study in Iranian COVID-19 patients. *Translational medicine communications*. 2021; 6(1):1–14. <https://doi.org/10.1186/s41231-021-00082-5> PMID: 33521322
71. Poeta M, Cioffi V, Buccigrossi V, Nanayakkara M, Baggieri M, Peltrini R, et al. Diosmectite inhibits the interaction between SARS-CoV-2 and human enterocytes by trapping viral particles, thereby preventing NF-kappaB activation and CXCL10 secretion. *Scientific reports*. 2021; 11(1):1–8.
72. Meini S, Giani T, Tascini C. Intussusceptive angiogenesis in Covid-19: hypothesis on the significance and focus on the possible role of FGF2. *Molecular Biology Reports*. 2020; 47(10):8301–4. <https://doi.org/10.1007/s11033-020-05831-7> PMID: 32920756
73. Bai S, Wu Y, Yan Y, Shao S, Zhang J, Liu J, et al. Construct a circRNA/miRNA/mRNA regulatory network to explore potential pathogenesis and therapy options of clear cell renal cell carcinoma. *Scientific Reports*. 2020; 10(1):1–15.
74. Arisan ED, Dart A, Grant GH, Arisan S, Cuhadaroglu S, Lange S, et al. The prediction of miRNAs in SARS-CoV-2 genomes: hsa-miR databases identify 7 key miRs linked to host responses and virus pathogenicity-related KEGG pathways significant for comorbidities. *Viruses*. 2020; 12(6):614. <https://doi.org/10.3390/v12060614> PMID: 32512929
75. Peng S, Wang J, Wei S, Li C, Zhou K, Hu J, et al. Endogenous cellular microRNAs mediate antiviral defense against influenza A virus. *Molecular Therapy-Nucleic Acids*. 2018; 10:361–75. <https://doi.org/10.1016/j.omtn.2017.12.016> PMID: 29499948
76. Sang H-y, Jin Y-l, Zhang W-q, Chen L-b. Downregulation of microRNA-637 increases risk of hypoxia-induced pulmonary hypertension by modulating expression of cyclin dependent kinase 6 (CDK6) in pulmonary smooth muscle cells. *Medical science monitor: international medical journal of experimental and clinical research*. 2016; 22:4066. <https://doi.org/10.12659/msm.897254> PMID: 27794186
77. Yan Q, Ma X, Shen C, Cao X, Feng N, Qin D, et al. Inhibition of Kaposi's sarcoma-associated herpesvirus lytic replication by HIV-1 Nef and cellular microRNA hsa-miR-1258. *Journal of virology*. 2014; 88(9):4987–5000. <https://doi.org/10.1128/JVI.00025-14> PMID: 24554664
78. Song J, Hu Y, Li H, Huang X, Zheng H, Hu Y, et al. miR-1303 regulates BBB permeability and promotes CNS lesions following CA16 infections by directly targeting MMP9. *Emerging microbes & infections*. 2018; 7(1):1–15. <https://doi.org/10.1038/s41426-018-0157-3> PMID: 30228270
79. Sung T-L, Rice AP. miR-198 inhibits HIV-1 gene expression and replication in monocytes and its mechanism of action appears to involve repression of cyclin T1. *PLoS pathogens*. 2009; 5(1):e1000263. <https://doi.org/10.1371/journal.ppat.1000263> PMID: 19148268

80. Bagasra O, Shamabadi NS, Pandey P, Desoky A, McLean E. Differential expression of miRNAs in a human developing neuronal cell line chronically infected with Zika virus. *Libyan Journal of Medicine*. 2021; 16(1):1909902. <https://doi.org/10.1080/19932820.2021.1909902> PMID: 33849406
81. Orumaa K, Dunne MR. The role of unconventional T cells in COVID-19. *Irish Journal of Medical Science (1971-)*. 2021:1–10. <https://doi.org/10.1007/s11845-021-02653-9> PMID: 34050887
82. Hasan MZ, Islam S, Matsumoto K, Kawai T. SARS-CoV-2 infection initiates interleukin-17-enriched transcriptional response in different cells from multiple organs. *Scientific reports*. 2021; 11(1):1–11.
83. Das D, Podder S. Unraveling the molecular crosstalk between Atherosclerosis and COVID-19 comorbidity. *Computers in biology and medicine*. 2021; 134:104459. <https://doi.org/10.1016/j.combiomed.2021.104459> PMID: 34020127
84. Gupta RK, Nwachuku EL, Zusman BE, Jha RM, Puccio AM. Drug repurposing for COVID-19 based on an integrative meta-analysis of SARS-CoV-2 induced gene signature in human airway epithelium. *Plos one*. 2021; 16(9):e0257784. <https://doi.org/10.1371/journal.pone.0257784> PMID: 34582497
85. Ai J, Hong W, Wu M, Wei X. Pulmonary vascular system: A vulnerable target for COVID-19. *MedComm*. 2021. <https://doi.org/10.1002/mco2.94> PMID: 34909758
86. Donlan AN, Sutherland TE, Marie C, Preissner S, Bradley BT, Carpenter RM, et al. IL-13 is a driver of COVID-19 severity. *medRxiv*. 2021: 2020.06. 18. <https://doi.org/10.1097/WNR.0b013e328337750f>
87. Rincon-Arevalo H, Aue A, Ritter J, Szelinski F, Khadzhynov D, Zickler D, et al. Altered increase in STAT1 expression and phosphorylation in severe COVID-19. *European Journal of Immunology*. 2021. <https://doi.org/10.1002/eji.202149575> PMID: 34676541
88. Giovannoni F, Li Z, Remes-Lenicov F, Dávola ME, Elizalde M, Paletta A, et al. AHR signaling is induced by infection with coronaviruses. *Nature communications*. 2021; 12(1):1–12.
89. Gisby J, Clarke CL, Medjeral-Thomas N, Malik TH, Papadaki A, Mortimer PM, et al. Longitudinal proteomic profiling of dialysis patients with COVID-19 reveals markers of severity and predictors of death. *Elife*. 2021; 10:e64827. <https://doi.org/10.7554/eLife.64827> PMID: 33704068
90. Balnis J, Madrid A, Hogan KJ, Drake LA, Chieng HC, Tiwari A, et al. Blood DNA methylation and COVID-19 outcomes. *Clinical epigenetics*. 2021; 13(1):1–16.
91. Lu S, Zhu N, Guo W, Wang X, Li K, Yan J, et al. RNA-Seq revealed a circular RNA-microRNA-mRNA regulatory network in Hantaan virus infection. *Frontiers in cellular and infection microbiology*. 2020; 10:97. <https://doi.org/10.3389/fcimb.2020.00097> PMID: 32232013
92. Hu Y, Xu Y, Deng X, Wang R, Li R, You L, et al. Comprehensive analysis of the circRNA expression profile and circRNA-miRNA-mRNA network in the pathogenesis of EV-A71 infection. *Virus Research*. 2021; 303:198502. <https://doi.org/10.1016/j.virusres.2021.198502> PMID: 34252490
93. Ai J, Li Y, Zhou X, Zhang W. COVID-19: treating and managing severe cases. *Cell Research*. 2020; 30(5):370–1. <https://doi.org/10.1038/s41422-020-0329-2> PMID: 32350393
94. Organization WH. Therapeutics and COVID-19: living guideline, 14 January 2022. World Health Organization, 2022.
